# Supplementary material for: Halide encapsulation by dicarboxylate oxido-vanadium cage complexes
Source: Royal Society of Chemistry journal article supplement (doi:10.1039/c7dt04251e), 2018-01-01
Supplement: c7dt04251e1.pdf [file c7dt04251e1.pdf]

## Electronic Supplementary Information (ESI)

### Halide encapsulation by dicarboxylate oxido-vanadium cage complexes

Margarita Gómez, Antonio Pastor, Eleuterio Álvarez, José Luis Olloqui-Sariego, and Agustín Galindo\*

---

**Figure S1.** NMR spectra of  $[\text{NBu}_4]_2[\text{V}_8\text{O}_{16}(\text{oda})_4\text{C}2\text{Cl}]$  (**1**).

**Figure S2.** NMR spectra of  $[\text{NBu}_4]_2[\text{V}_8\text{O}_{16}(\text{glut})_4\text{C}2\text{Cl}]$  (**2**).

**Figure S3.** NMR spectra of  $[\text{NBu}_4][\text{V}_4\text{O}_8(\text{glut})_2\text{C}2\text{F}]$  (**3**).

**Figure S4.** Cyclic voltammograms normalised with respect to scan rate of polyoxovanadate complexes in 0.1M  $[\text{Bu}_4\text{N}]\text{PF}_6$  in acetonitrile at 25 °C. The scan rates are 0.02, 0.05, 0.1, 0.5, 1, 5, 10 and 50  $\text{Vs}^{-1}$ . The concentration of complexes **1** and **3** was 0.5mM, whereas that a saturated solution ( $< 0.1$  mM) was used for complex **2**.

**Figure S5.** Cyclic voltammograms for the polyoxovanadate complexes **1-3** recorded at 0.1  $\text{Vs}^{-1}$  in 0.1M  $[\text{Bu}_4\text{N}]\text{PF}_6$  in acetonitrile at 25 °C. The concentration of complexes **1** and **3** was 0.5mM, whereas that a saturated solution ( $< 0.1$  mM) was used for complex **2**.

**Table S1.** Crystallographic data for compounds  $[\text{NBu}_4]_2[\text{V}_8\text{O}_{16}(\text{oda})_4\text{C}2\text{Cl}]$  (**1**),  $[\text{NBu}_4]_2[\text{V}_8\text{O}_{16}(\text{glut})_4\text{C}2\text{Cl}]$  (**2**) and  $[\text{NBu}_4][\text{V}_4\text{O}_8(\text{glut})_2\text{C}2\text{F}]$  (**3**).

**Table S2.** Selected V-O bond distances for vanadium complexes **1-3**.

**Table S3** Comparison of selected computed and experimental structural parameters of **1** and **2**.

**Table S4** Comparison of selected computed and experimental structural parameters of **3**.

**Figure S6.** Optimised structure of **2ic**, an isomer of  $[\text{V}_8\text{O}_{16}(\text{glut})_4\text{C}2\text{Cl}]^{2-}$ , **2c**.

**Figure S7.** Optimised structures of  $[\text{V}_8\text{O}_{16}(\text{oda})_4]$ , **4c**, and  $[\text{V}_8\text{O}_{16}(\text{glut})_4]$ , **5c**.

**Figure S8.** Left: HOMO-6 of  $[\text{V}_8\text{O}_{16}(\text{oda})_4\text{C}2\text{Cl}]^{2-}$ , **1c**. Right: HOMO-5 of  $[\text{V}_8\text{O}_{16}(\text{glut})_4\text{C}2\text{Cl}]^{2-}$ , **2c**.

**Figure S9.** Optimised structures of  $[\text{V}_8\text{O}_{16}(\text{oda})_4\text{C}(\text{Cl}_2)]$ , **6c**, and  $[\text{V}_8\text{O}_{16}(\text{glut})_4\text{C}(\text{Cl}_2)]$ , **7c**.

**Figure S10.** Optimised structure of  $[\text{V}_8\text{O}_{16}(\text{glut})_4\text{C}2\text{F}]^{2-}$ , **8c**.

**Figure S11.** Thermogravimetric analyses for complexes **1-3**.

**Figure S12.** Comparison of the XRPDs for complexes **1-3**.

**Table S5.** Coordinates of the computed compounds.

---

**Figure S1.** NMR spectra of  $[\text{NBu}_4]_2[\text{V}_8\text{O}_{16}(\text{oda})_4 \cdot 2\text{Cl}]$  (**1**).

$^1\text{H}$  NMR ( $\text{CD}_3\text{CN}$ )

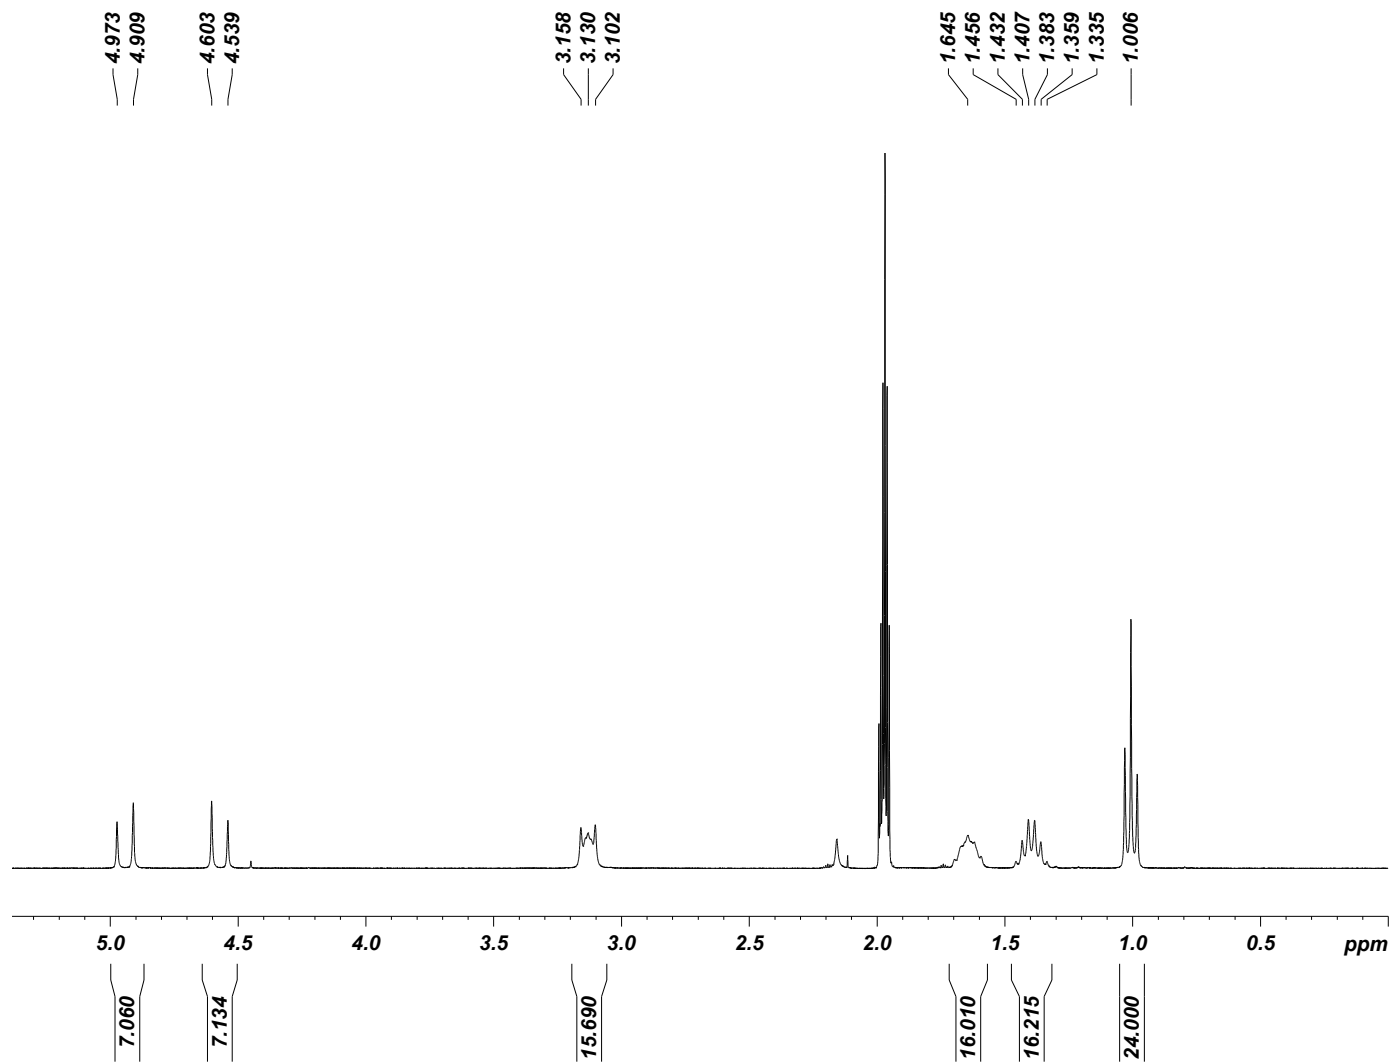

$^{13}\text{C}\{^1\text{H}\}$  NMR ( $\text{CD}_3\text{CN}$ )

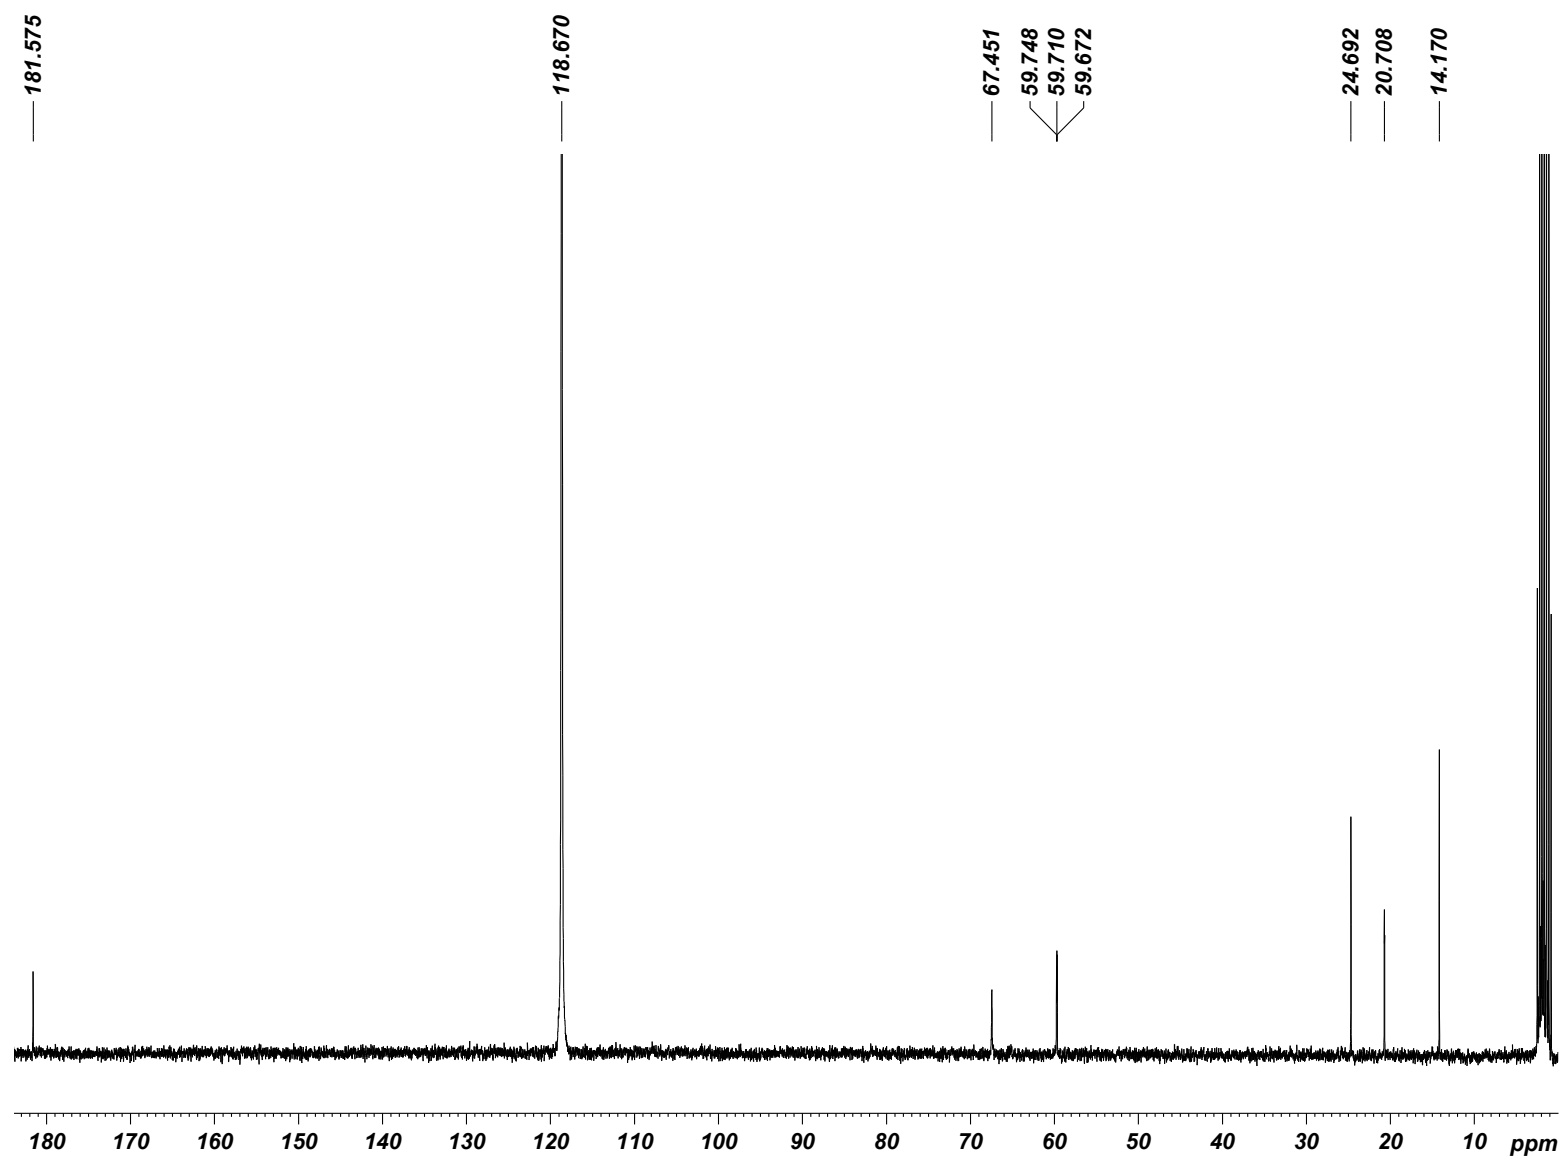

COSY (CD<sub>3</sub>CN)

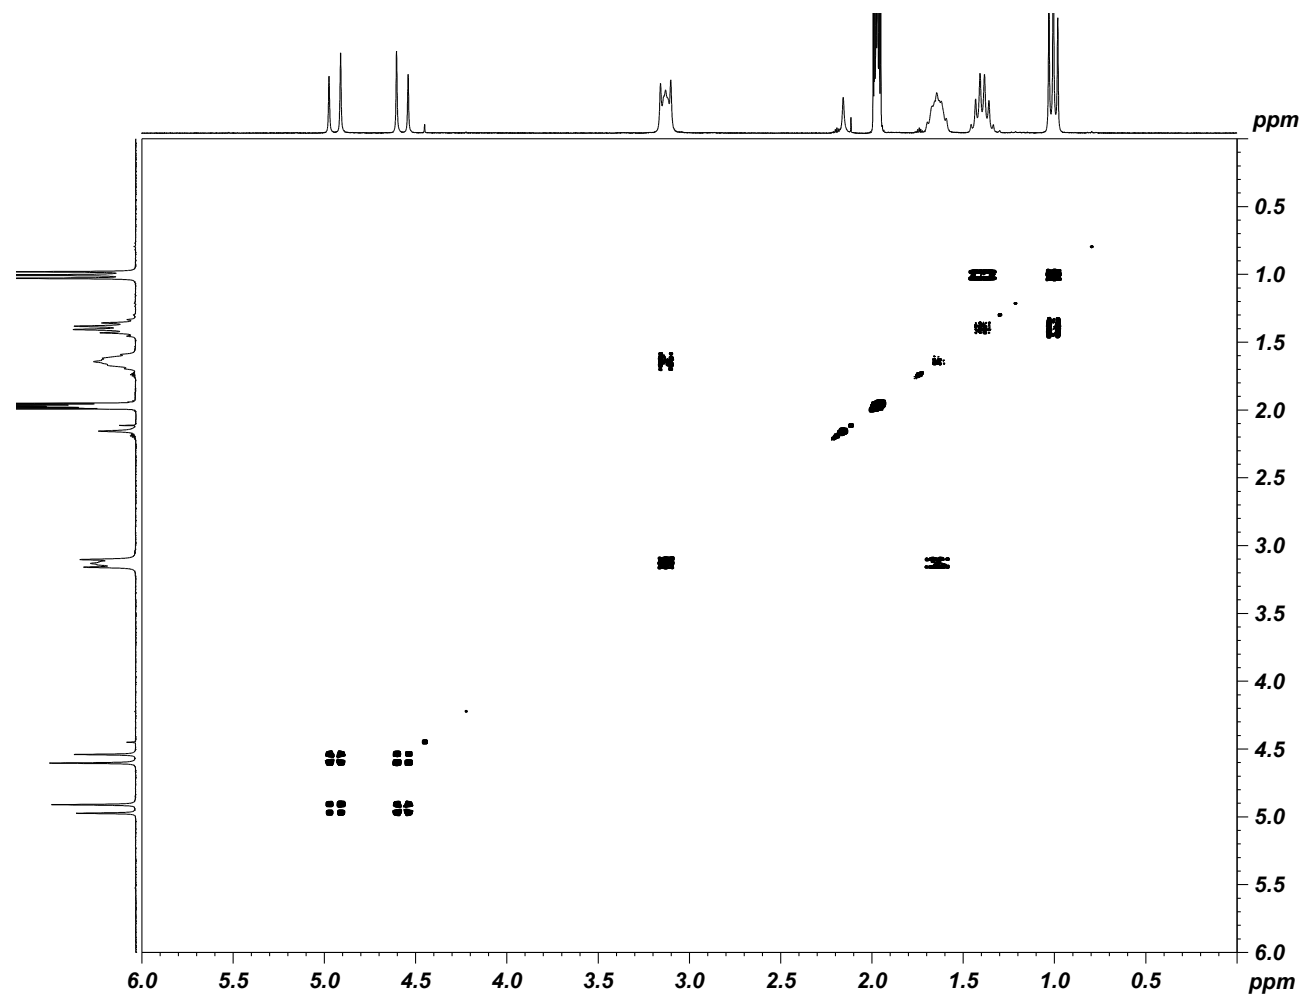

2D heteronuclear NMR (CD<sub>3</sub>CN)

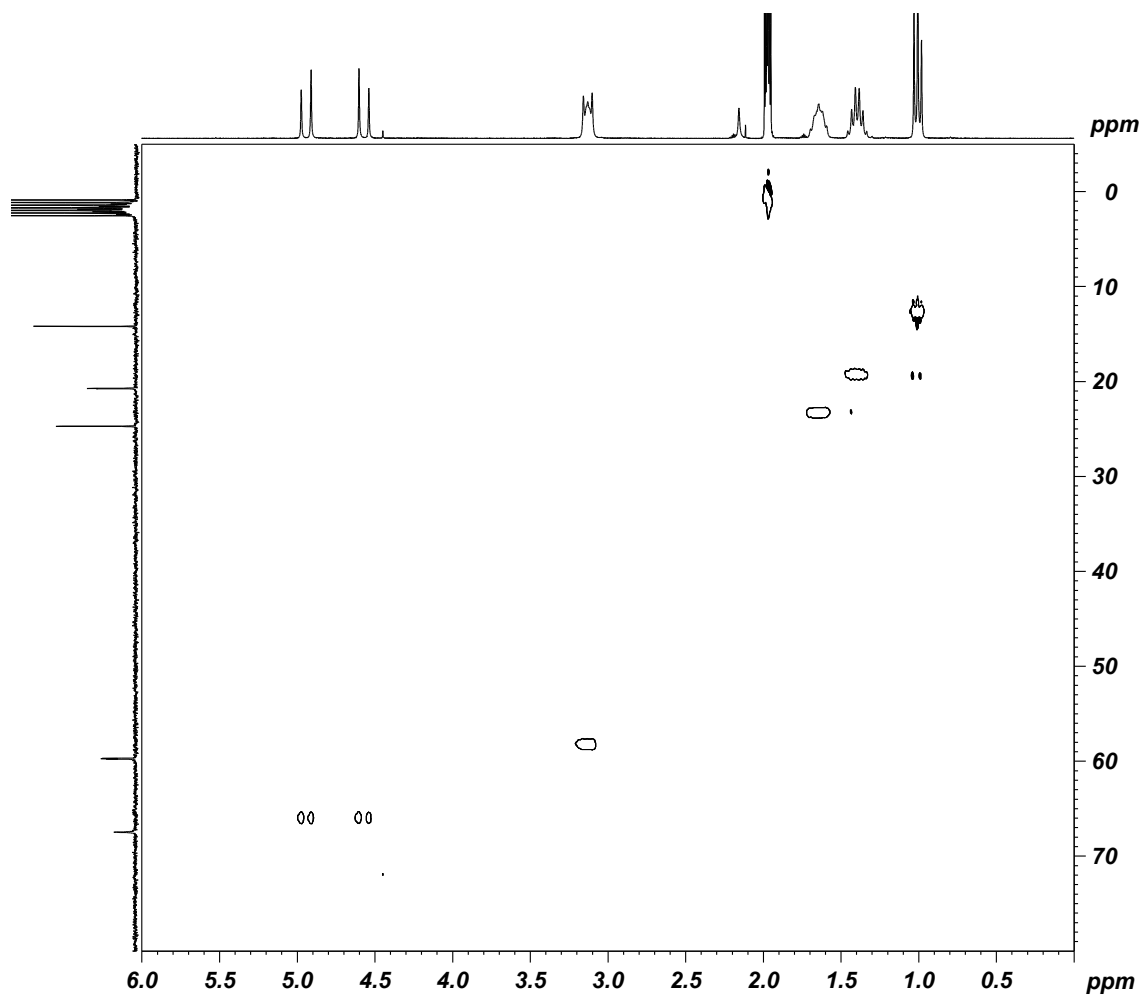

**Figure S2.** NMR spectra of  $[\text{NBu}_4]_2[\text{V}_8\text{O}_{16}(\text{glut})_4 \cdot 2\text{Cl}]$  (**2**).

$^1\text{H}$  NMR (DMSO- $d_6$ )

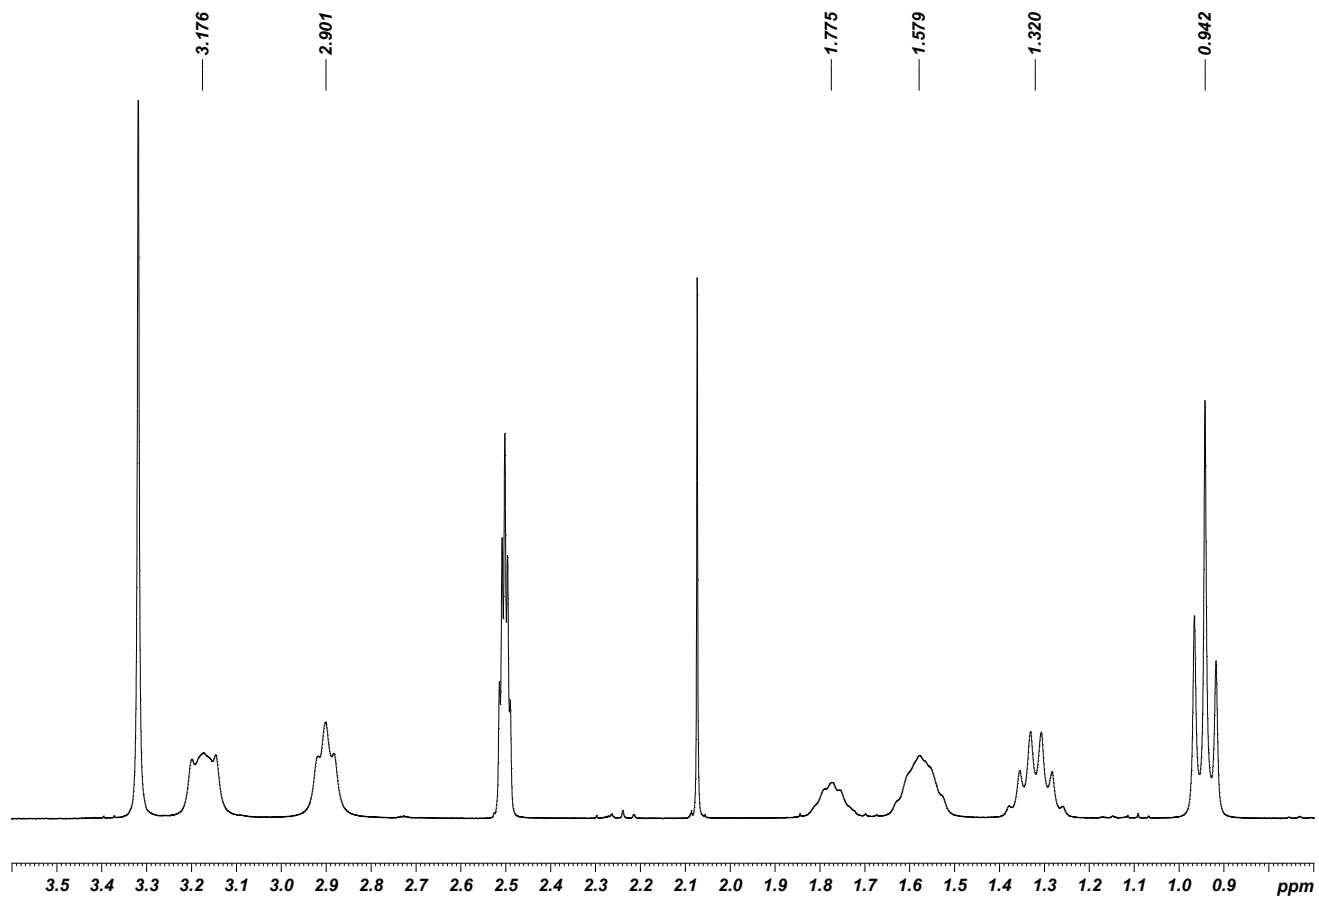

$^{13}\text{C}\{^1\text{H}\}$  NMR (DMSO- $d_6$ )

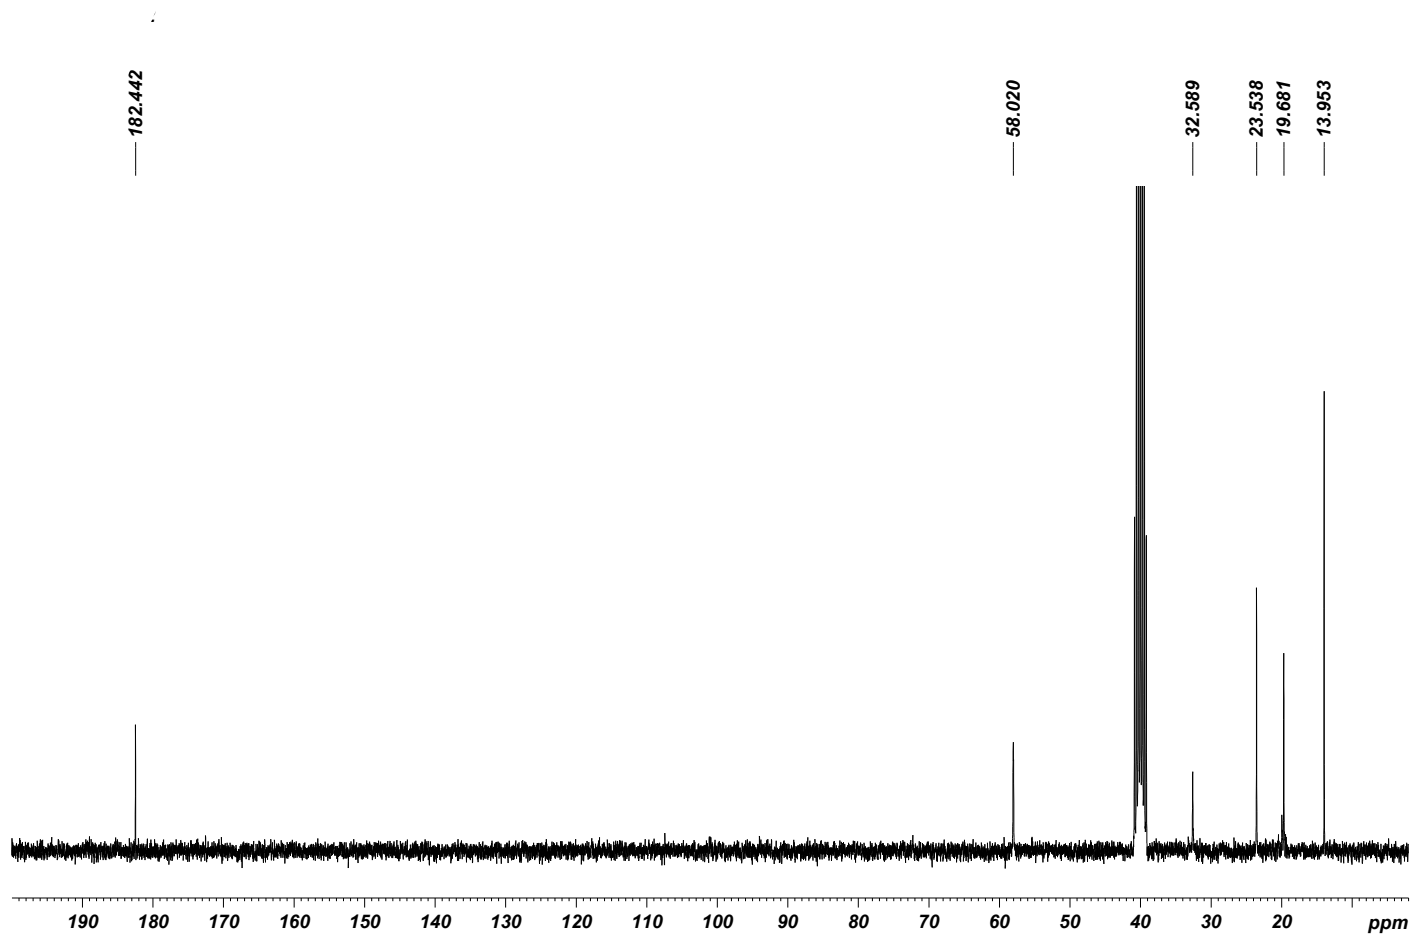

COSY (DMSO-d<sub>6</sub>)

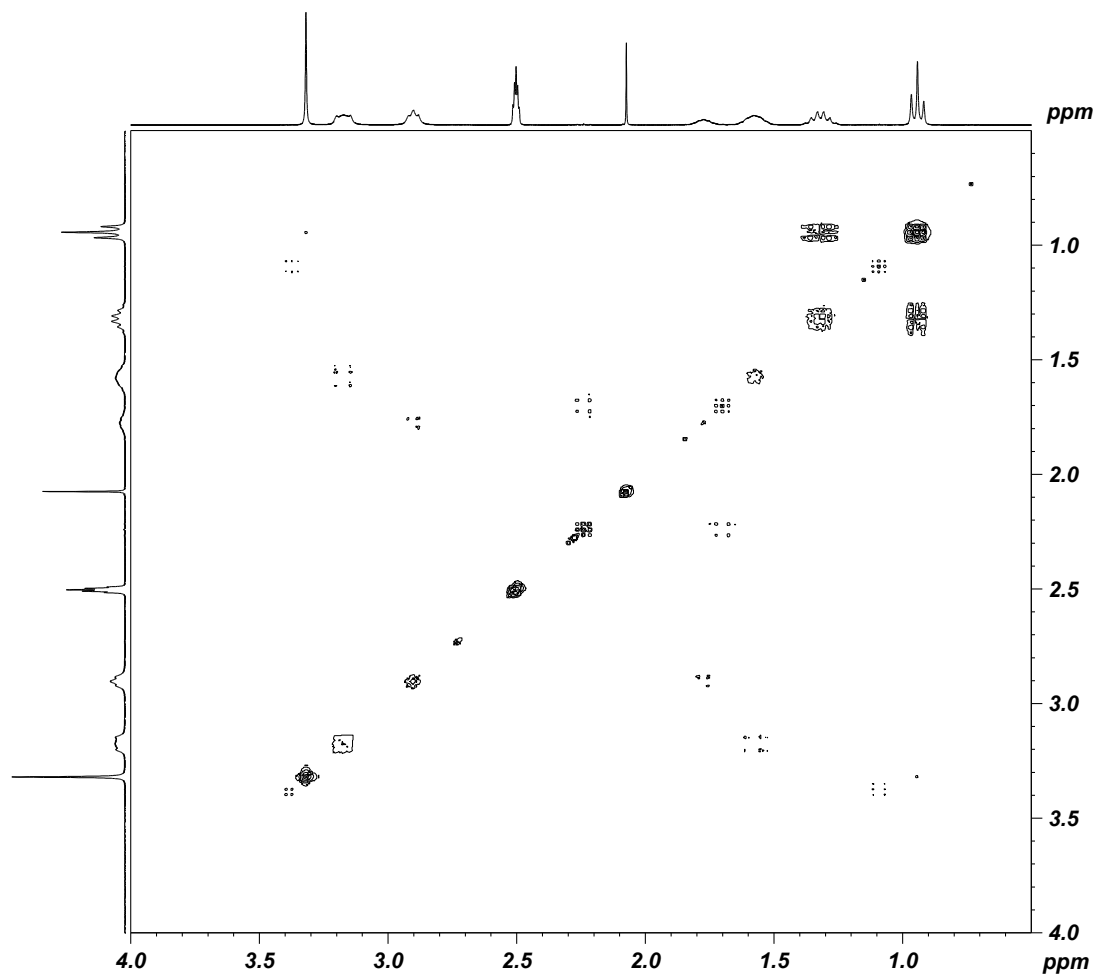



2D heteronuclear NMR (DMSO-d<sub>6</sub>)

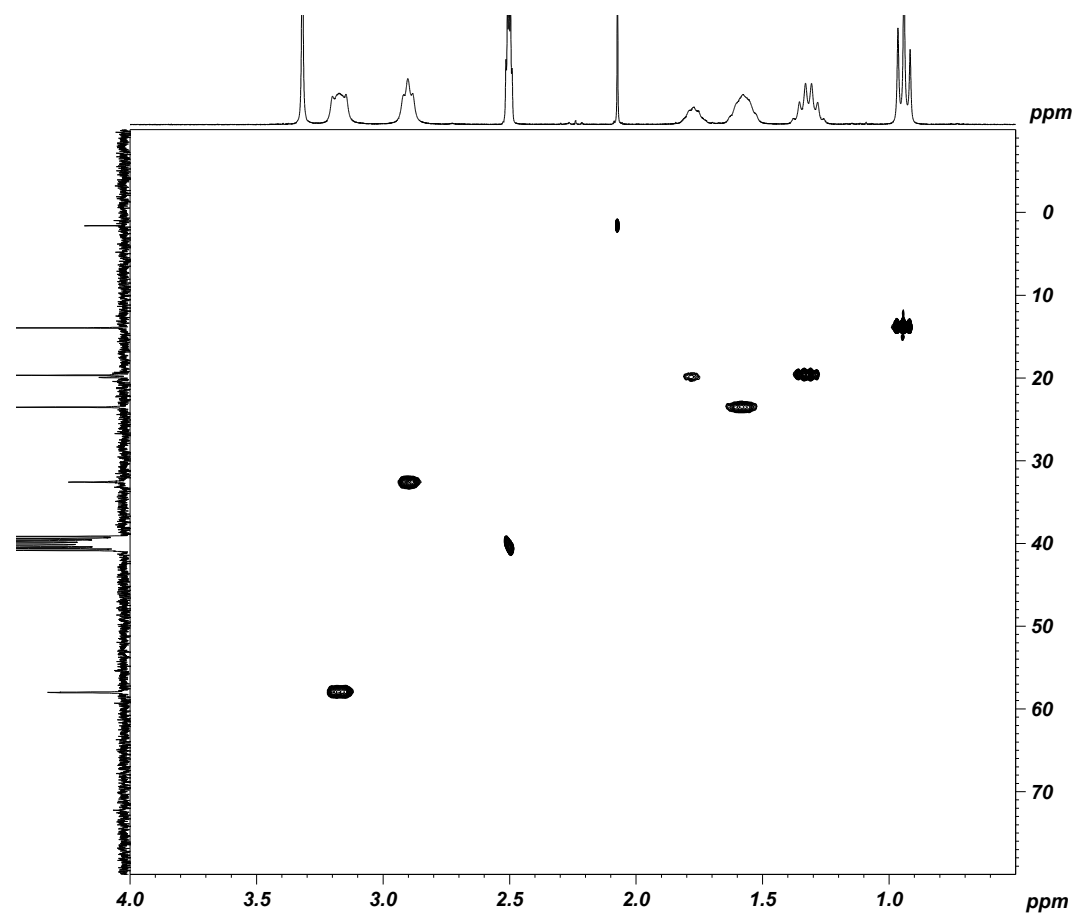

**Figure S3.** NMR spectra of  $[\text{NBu}_4][\text{V}_4\text{O}_8(\text{glut})_2\text{CF}]$  (**3**).

$^1\text{H}$  NMR ( $\text{CD}_3\text{CN}$ )

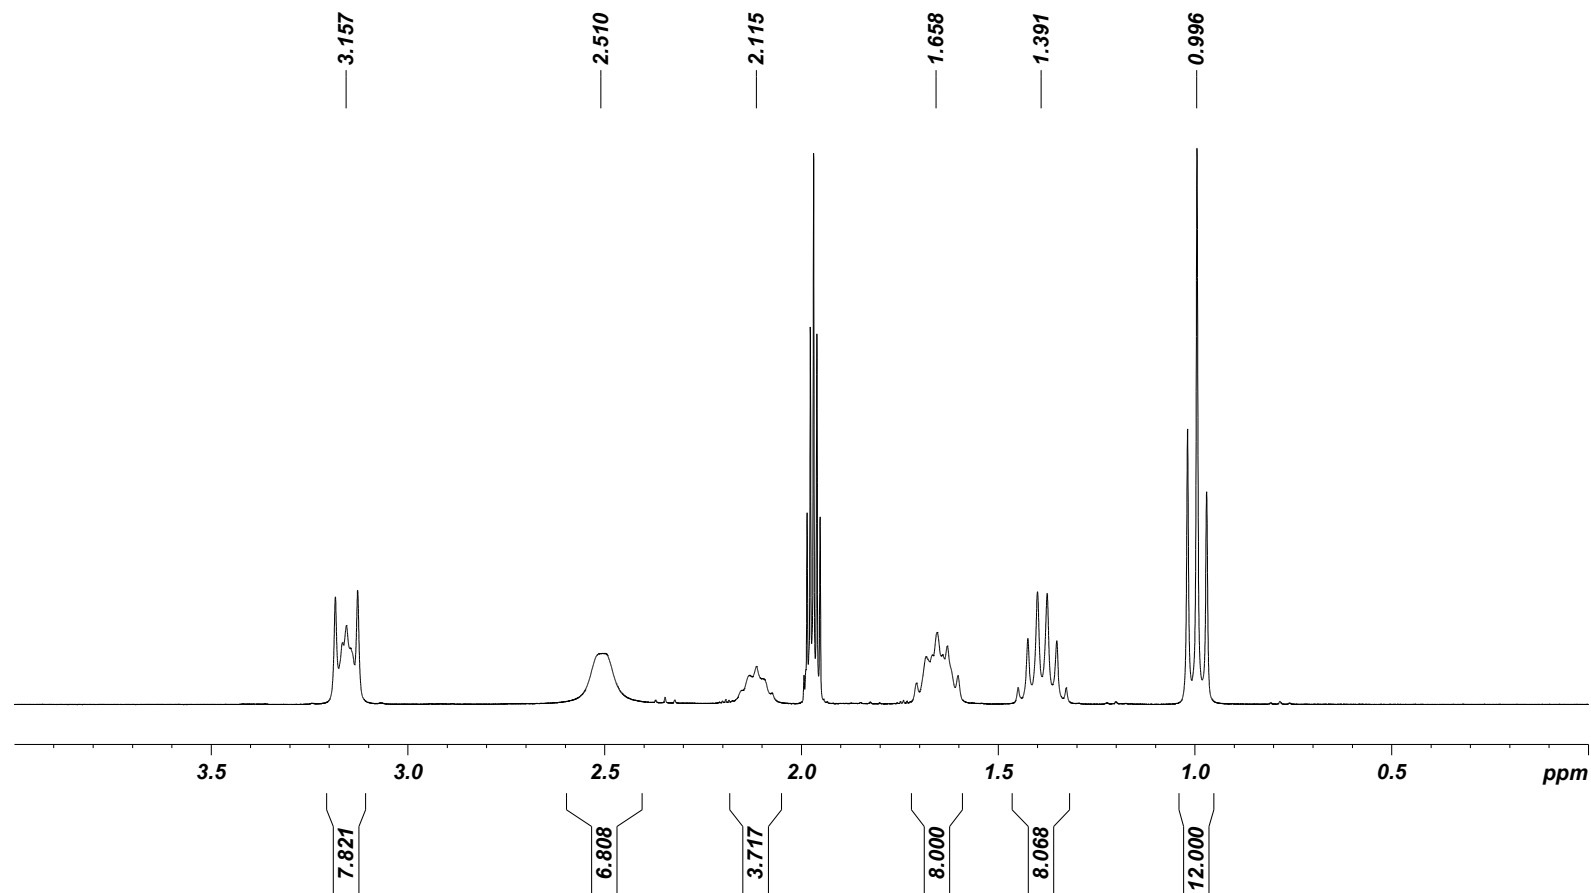

$^{13}\text{C}\{^1\text{H}\}$  NMR ( $\text{CD}_3\text{CN}$ )

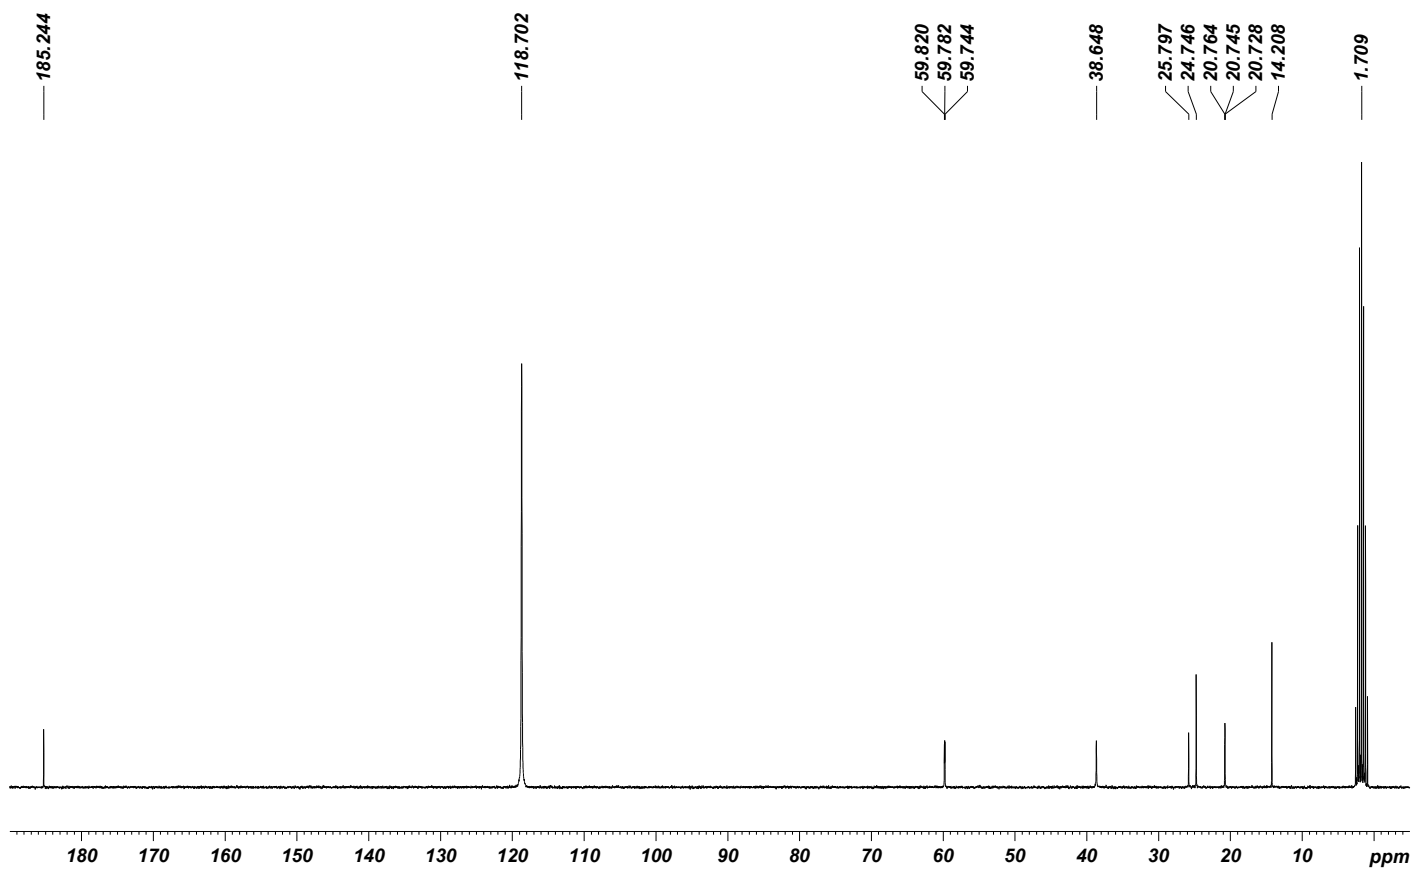

COSY (CD<sub>3</sub>CN)

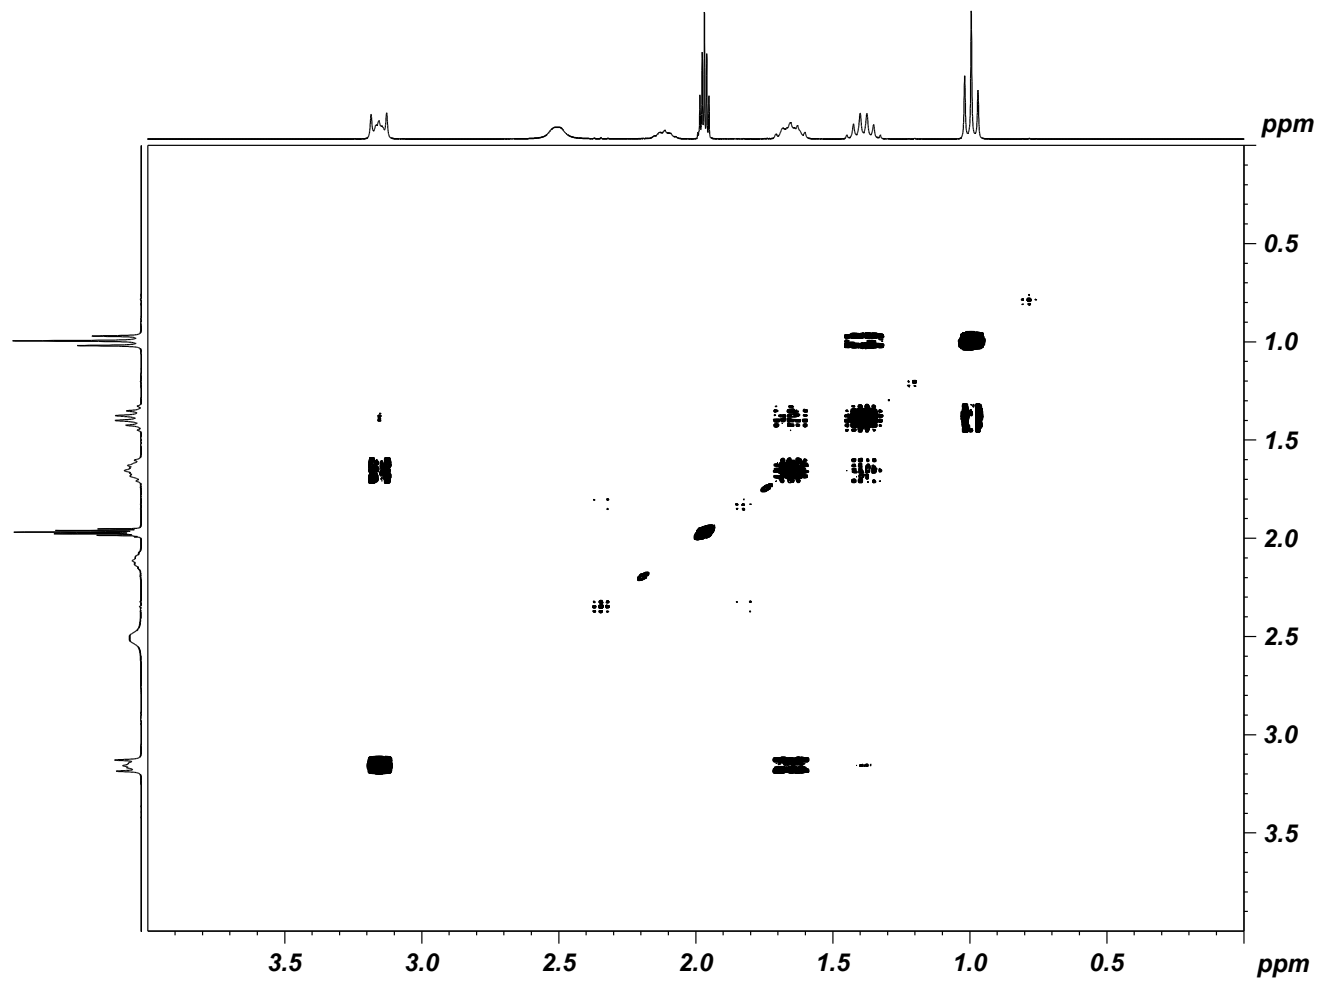

2D heteronuclear NMR (CD<sub>3</sub>CN)

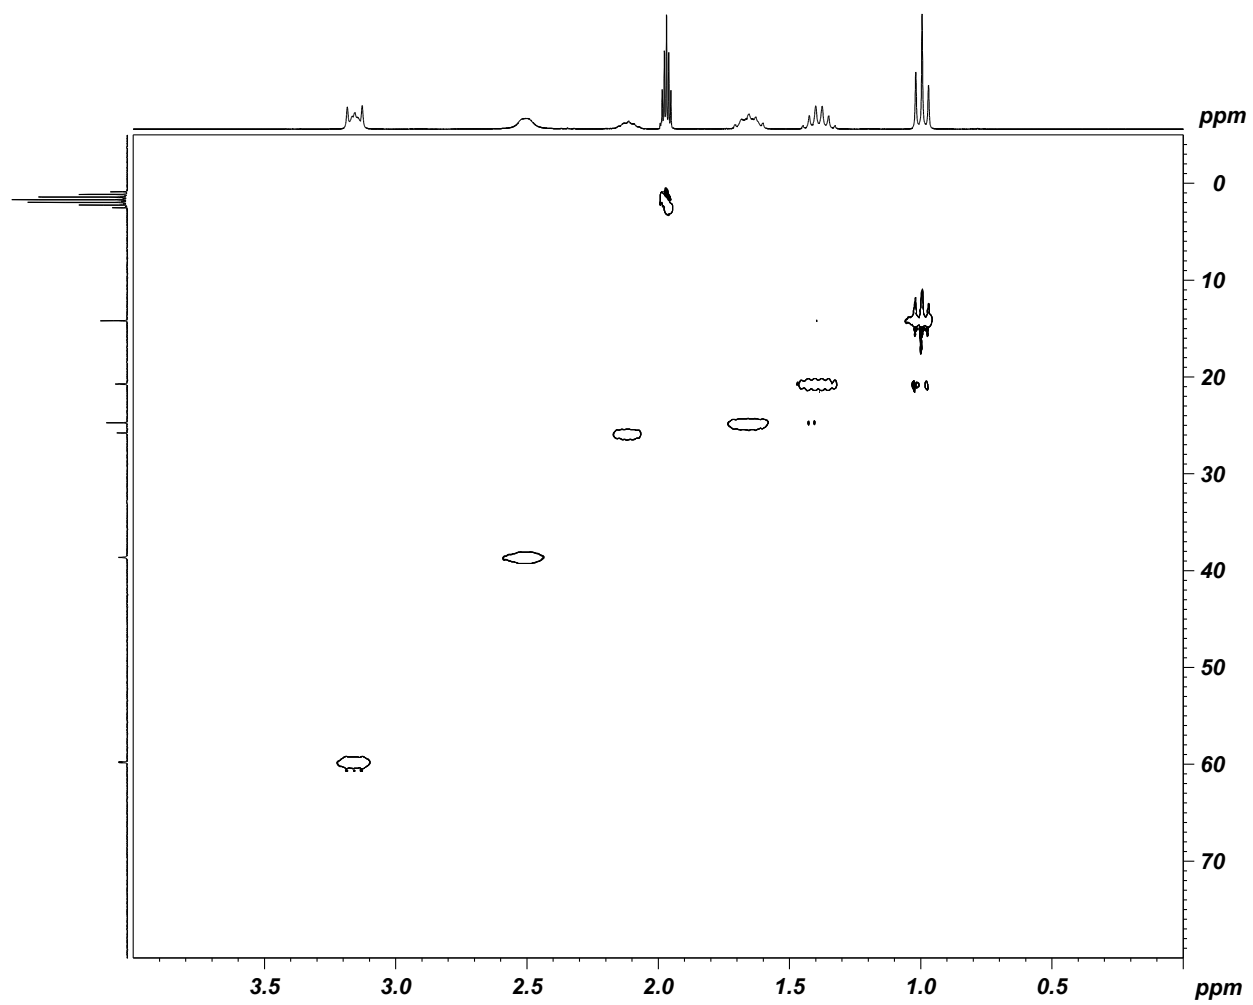

**Figure S4.** Cyclic voltammograms normalised with respect to scan rate of polyoxovanadate complexes in 0.1M [Bu<sub>4</sub>N]PF<sub>6</sub> in acetonitrile at 25 °C. The scan rates are 0.02, 0.05, 0.1, 0.5, 1, 5, 10 and 50 Vs<sup>-1</sup>. The concentration of complexes **1** and **3** was 0.5mM, whereas that a saturated solution (< 0.1 mM) was used for complex **2**.

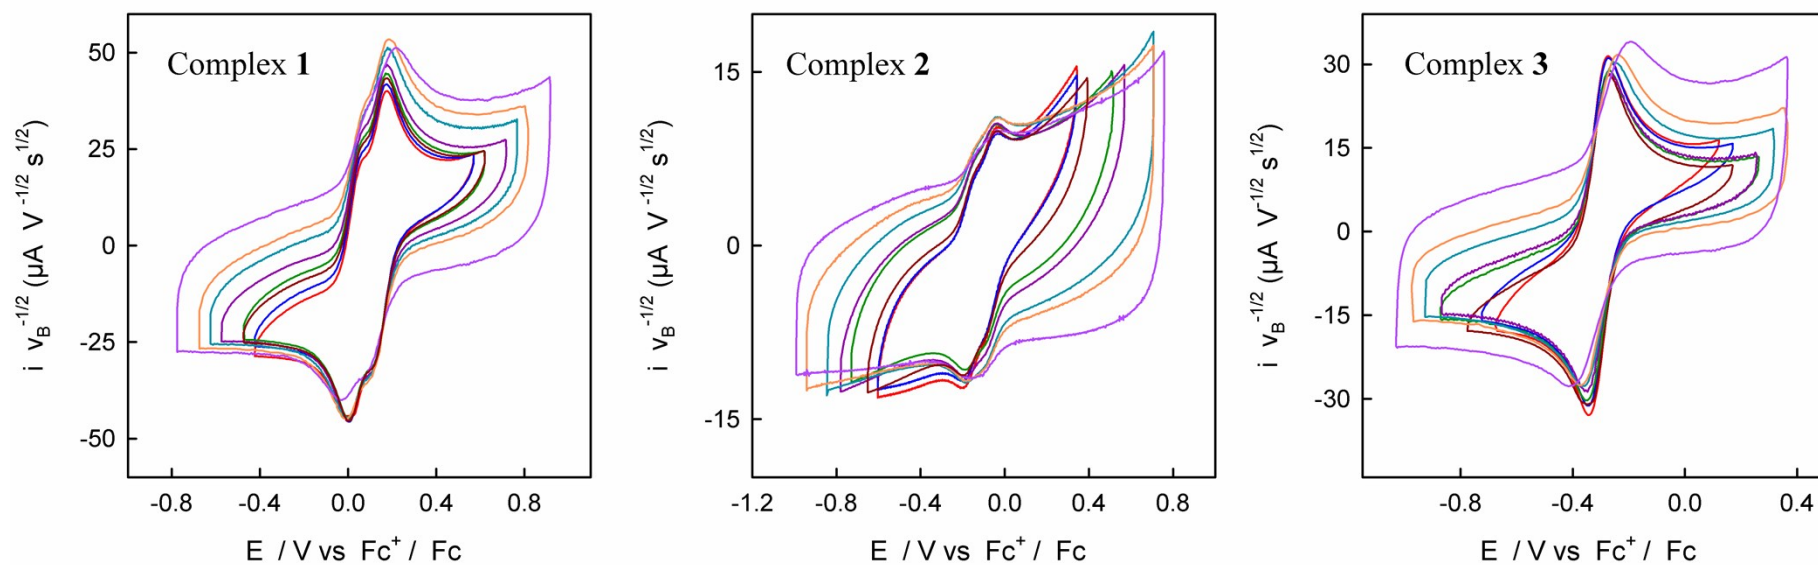

**Figure S5.** Cyclic voltammograms for the indicated polyoxovanadate complexes **1-3** recorded at  $0.1 \text{ Vs}^{-1}$  in  $0.1 \text{ M } [\text{Bu}_4\text{N}]\text{PF}_6$  in acetonitrile at  $25 \text{ }^\circ\text{C}$ . The concentration of complexes **1** and **3** was  $0.5 \text{ mM}$ , whereas that a saturated solution ( $< 0.1 \text{ mM}$ ) was used for complex **2**.

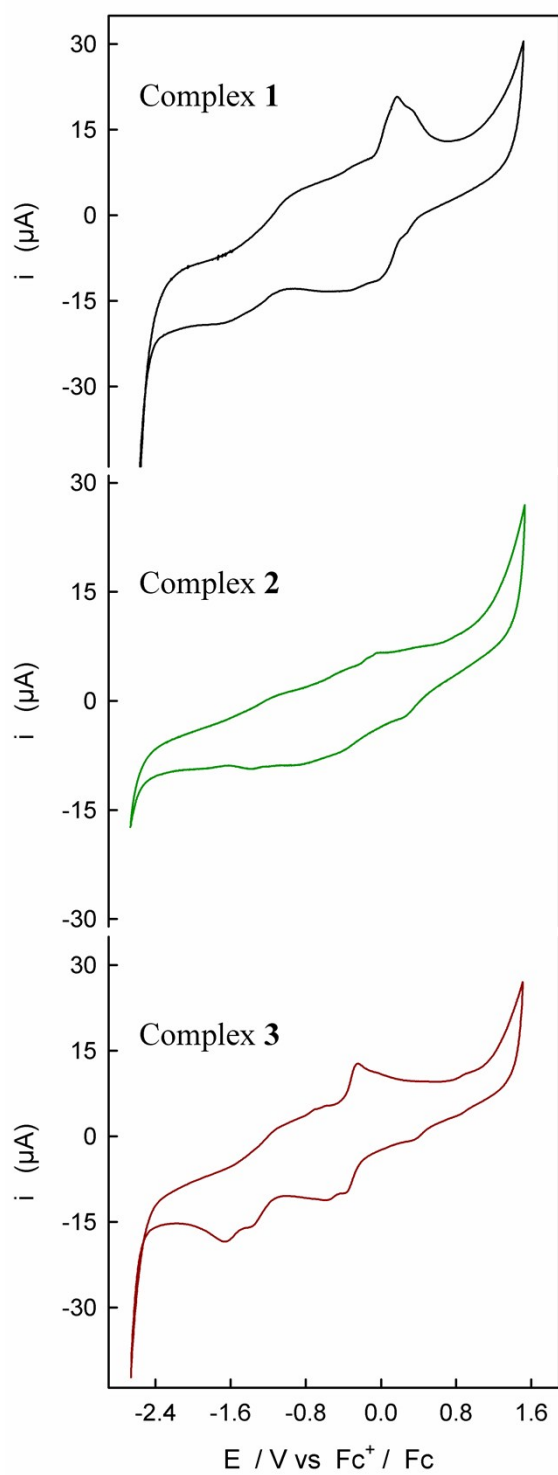

**Table S1.** Crystallographic data for compounds [Bu<sub>4</sub>N]<sub>2</sub>[V<sub>8</sub>O<sub>16</sub>(oda)<sub>4</sub>·2Cl] (**1**), [Bu<sub>4</sub>N]<sub>2</sub>[V<sub>8</sub>O<sub>16</sub>(glut)<sub>4</sub>·2Cl] (**2**) and [Bu<sub>4</sub>N][V<sub>4</sub>O<sub>8</sub>(glut)<sub>2</sub>·F] (**3**).

|                                                        | <b>1</b>                                                                                      | <b>2</b>                                                                                      | <b>3</b>                                                         |
|--------------------------------------------------------|-----------------------------------------------------------------------------------------------|-----------------------------------------------------------------------------------------------|------------------------------------------------------------------|
| Empirical formula                                      | C <sub>54</sub> H <sub>97</sub> Cl <sub>2</sub> N <sub>5</sub> O <sub>36</sub> V <sub>8</sub> | C <sub>52</sub> H <sub>96</sub> Cl <sub>2</sub> N <sub>2</sub> O <sub>32</sub> V <sub>8</sub> | C <sub>26</sub> H <sub>48</sub> FNO <sub>16</sub> V <sub>4</sub> |
| Formula weight                                         | 1870.78                                                                                       | 1739.72                                                                                       | 853.41                                                           |
| Temperature (K)                                        | 193(2)                                                                                        | 193(2)                                                                                        | 193(2)                                                           |
| Wavelength (Å)                                         | 0.71073                                                                                       | 0.71073                                                                                       | 0.71073                                                          |
| Crystal system                                         | Triclinic                                                                                     | Triclinic                                                                                     | Monoclinic                                                       |
| Space group                                            | P $\bar{1}$                                                                                   | P $\bar{1}$                                                                                   | P2 <sub>1</sub> /c                                               |
| a (Å)                                                  | 16.3158(6)                                                                                    | 14.8986(4)                                                                                    | 23.418(12)                                                       |
| b (Å)                                                  | 16.3786(6)                                                                                    | 16.7125(5)                                                                                    | 13.297(8)                                                        |
| c (Å)                                                  | 16.7821(6)                                                                                    | 17.4333(5)                                                                                    | 23.133(13)                                                       |
| $\alpha$ (°)                                           | 90.9530(10)                                                                                   | 64.2850(10)                                                                                   | 90                                                               |
| $\beta$ (°)                                            | 117.9780(10)                                                                                  | 85.7850(10)                                                                                   | 90.199(13)                                                       |
| $\gamma$ (°)                                           | 93.3520(10)                                                                                   | 86.1320(10)                                                                                   | 90                                                               |
| Volume (Å <sup>3</sup> )                               | 3948.8(2)                                                                                     | 3897.24(19)                                                                                   | 7203(7)                                                          |
| Z                                                      | 2                                                                                             | 2                                                                                             | 8                                                                |
| Density (calculated, Mg·m <sup>-3</sup> )              | 1.573                                                                                         | 1.483                                                                                         | 1.574                                                            |
| Absorption coefficient (mm <sup>-1</sup> )             | 1.059                                                                                         | 1.062                                                                                         | 1.079                                                            |
| F(000)                                                 | 1924                                                                                          | 1792                                                                                          | 3520                                                             |
| Crystal size (mm <sup>3</sup> )                        | 0.40 x 0.30 x 0.15                                                                            | 0.30 x 0.20 x 0.20                                                                            | 0.45 x 0.40 x 0.30                                               |
| Reflections collected                                  | 71065                                                                                         | 49714                                                                                         | 69352                                                            |
| Independent reflections                                | 14200                                                                                         | 14080                                                                                         | 13007                                                            |
| Final R indices [I>2 $\sigma$ (I)], R <sub>I</sub> [a] | 0.0450                                                                                        | 0.0586                                                                                        | 0.0556                                                           |
| R indices (all data), wR(F <sup>2</sup> ) [b]          | 0.1375                                                                                        | 0.1739                                                                                        | 0.1759                                                           |
| S(F <sup>2</sup> ) [c]                                 | 1.089                                                                                         | 1.030                                                                                         | 1.076                                                            |
| CCDC                                                   | 1573268                                                                                       | 1573269                                                                                       | 1573270                                                          |

[a]  $R_I = \Sigma||F_o| - |F_c| / \Sigma|F_o|$ ; [b]  $wR(F^2) = \{\Sigma[w(F_o^2 - F_c^2)^2] / \Sigma[w(F_o^2)^2]\}^{1/2}$ . [c] Goodness-of-fit,  $S(F^2) = \{\Sigma[w(F_o^2 - F_c^2)^2] / (n-p)\}^{1/2}$  where n is the reflections number and p is the parameters number.



**Table S2.** Selected V-O bond distances for vanadium complexes **1-3**.

| Distances (Å)        | <b>1</b>            |                     | <b>2</b>              |  | <b>3</b>            |
|----------------------|---------------------|---------------------|-----------------------|--|---------------------|
| V=O                  | V(1)-O(21) 1.585(2) | V(5)-O(29) 1.588(2) | V(1)-O(1) 1.590(3)    |  | V(1)-O(21) 1.585(2) |
|                      | V(2)-O(22) 1.584(2) | V(6)-O(30) 1.585(2) | V(2)-O(3) 1.593(3)    |  | V(2)-O(22) 1.584(2) |
|                      | V(3)-O(23) 1.591(2) | V(7)-O(31) 1.586(2) | V(3)-O(9) 1.587(3)    |  | V(3)-O(23) 1.591(2) |
|                      | V(4)-O(24) 1.592(2) | V(8)-O(32) 1.588(2) | V(4)-O(11) 1.596(3)   |  | V(4)-O(24) 1.592(2) |
| V-O                  | V(1)-O(25) 1.729(2) | V(5)-O(33) 1.739(2) | V(1)-O(2) 1.785(3)    |  | V(1)-O(25) 1.729(2) |
|                      | V(1)-O(28) 1.907(2) | V(5)-O(36) 1.896(2) | V(1)-O(4) 1.839(3)    |  | V(1)-O(28) 1.907(2) |
|                      | V(2)-O(26) 1.735(2) | V(6)-O(34) 1.734(2) | V(2)-O(12)#1 1.784(3) |  | V(2)-O(26) 1.735(2) |
|                      | V(2)-O(25) 1.903(2) | V(6)-O(33) 1.890(2) | V(2)-O(2) 1.834(3)    |  | V(2)-O(25) 1.903(2) |
|                      | V(3)-O(27) 1.729(2) | V(7)-O(35) 1.737(2) | V(3)-O(4)#1 1.789(3)  |  | V(3)-O(27) 1.729(2) |
|                      | V(3)-O(26) 1.887(2) | V(7)-O(34) 1.901(2) | V(3)-O(10) 1.844(3)   |  | V(3)-O(26) 1.887(2) |
|                      | V(4)-O(28) 1.735(2) | V(8)-O(36) 1.743(2) | V(4)-O(10) 1.792(3)   |  | V(4)-O(28) 1.735(2) |
|                      | V(4)-O(27) 1.901(2) | V(8)-O(35) 1.895(2) | V(4)-O(12) 1.846(3)   |  | V(4)-O(27) 1.901(2) |
| V-O<br>(carboxylate) | V(1)-O(11) 1.991(2) | V(5)-O(19) 1.986(2) | V(1)-O(7) 1.994(3)    |  | V(1)-O(11) 1.991(2) |
|                      | V(1)-O(6) 2.049(2)  | V(5)-O(4) 2.047(2)  | V(1)-O(5) 2.009(3)    |  | V(1)-O(6) 2.049(2)  |
|                      | V(2)-O(16) 1.983(2) | V(6)-O(14) 1.981(2) | V(2)-O(16)#1 2.000(3) |  | V(2)-O(16) 1.983(2) |
|                      | V(2)-O(12) 2.045(2) | V(6)-O(20) 2.052(2) | V(2)-O(8) 2.023(3)    |  | V(2)-O(12) 2.045(2) |
|                      | V(3)-O(1) 1.983(2)  | V(7)-O(9) 1.976(2)  | V(3)-O(6)#1 2.001(3)  |  | V(3)-O(1) 1.983(2)  |
|                      | V(3)-O(17) 2.061(2) | V(7)-O(15) 2.059(2) | V(3)-O(13) 2.012(3)   |  | V(3)-O(17) 2.061(2) |
|                      | V(4)-O(7) 1.978(2)  | V(8)-O(5) 1.998(2)  | V(4)-O(14) 1.990(3)   |  | V(4)-O(7) 1.978(2)  |
|                      | V(4)-O(2) 2.056(2)  | V(8)-O(10) 2.053(2) | V(4)-O(15) 2.023(3)   |  | V(4)-O(2) 2.056(2)  |

Symmetry transformations used to generate equivalent atoms of complex **2**: #1 -x,-y+1,-z; #2 -x+1,-y+1,-z+1.

**Table S3.** Comparison of selected computed and experimental structural parameters of **1** and **2**.

| Distances (Å)        | <b>1</b>   |          |            |          | <b>1c</b> | <b>2</b>     |          | <b>2c</b> |
|----------------------|------------|----------|------------|----------|-----------|--------------|----------|-----------|
| V=O                  | V(1)-O(21) | 1.585(2) | V(5)-O(29) | 1.588(2) | 1.569     | V(1)-O(1)    | 1.590(3) | 1.571     |
|                      | V(2)-O(22) | 1.584(2) | V(6)-O(30) | 1.585(2) |           | V(2)-O(3)    | 1.593(3) |           |
|                      | V(3)-O(23) | 1.591(2) | V(7)-O(31) | 1.586(2) |           | V(3)-O(9)    | 1.587(3) |           |
|                      | V(4)-O(24) | 1.592(2) | V(8)-O(32) | 1.588(2) |           | V(4)-O(11)   | 1.596(3) |           |
| V-O                  | V(1)-O(25) | 1.729(2) | V(5)-O(33) | 1.739(2) | 1.722     | V(1)-O(2)    | 1.785(3) | 1.726     |
|                      | V(1)-O(28) | 1.907(2) | V(5)-O(36) | 1.896(2) | 1.865     | V(1)-O(4)    | 1.839(3) | 1.861     |
|                      | V(2)-O(26) | 1.735(2) | V(6)-O(34) | 1.734(2) |           | V(2)-O(12)#1 | 1.784(3) | 1.728     |
|                      | V(2)-O(25) | 1.903(2) | V(6)-O(33) | 1.890(2) |           | V(2)-O(2)    | 1.834(3) | 1.858     |
|                      | V(3)-O(27) | 1.729(2) | V(7)-O(35) | 1.737(2) |           | V(3)-O(4)#1  | 1.789(3) | 1.726     |
|                      | V(3)-O(26) | 1.887(2) | V(7)-O(34) | 1.901(2) |           | V(3)-O(10)   | 1.844(3) | 1.857     |
|                      | V(4)-O(28) | 1.735(2) | V(8)-O(36) | 1.743(2) |           | V(4)-O(10)   | 1.792(3) | 1.725     |
|                      | V(4)-O(27) | 1.901(2) | V(8)-O(35) | 1.895(2) |           | V(4)-O(12)   | 1.846(3) | 1.856     |
| V-O<br>(carboxylate) | V(1)-O(11) | 1.991(2) | V(5)-O(19) | 1.986(2) | 2.006     | V(1)-O(7)    | 1.994(3) | 2.011     |
|                      | V(1)-O(6)  | 2.049(2) | V(5)-O(4)  | 2.047(2) | 2.079     | V(1)-O(5)    | 2.009(3) | 2.064     |
|                      | V(2)-O(16) | 1.983(2) | V(6)-O(14) | 1.981(2) |           | V(2)-O(16)#1 | 2.000(3) | 1.999     |
|                      | V(2)-O(12) | 2.045(2) | V(6)-O(20) | 2.052(2) |           | V(2)-O(8)    | 2.023(3) | 2.058     |
|                      | V(3)-O(1)  | 1.983(2) | V(7)-O(9)  | 1.976(2) |           | V(3)-O(6)#1  | 2.001(3) | 2.002     |
|                      | V(3)-O(17) | 2.061(2) | V(7)-O(15) | 2.059(3) |           | V(3)-O(13)   | 2.012(3) | 2.052     |
|                      | V(4)-O(7)  | 1.978(2) | V(8)-O(5)  | 1.998(2) |           | V(4)-O(14)   | 1.990(3) |           |
|                      | V(4)-O(2)  | 2.056(2) | V(8)-O(10) | 2.053(2) |           | V(4)-O(15)   | 2.023(3) |           |
| Cl...Cl              | 4.049(1)   |          |            |          | 3.868     | 4.728(1)     |          | 4.613     |

**Table S4.** Comparison of selected computed and experimental structural parameters of **3**.

| Distances (Å)     | <b>3</b>   | <b>3c</b> |       |
|-------------------|------------|-----------|-------|
| V=O               | V(1)-O(1)  | 1.589(3)  | 1.573 |
|                   | V(2)-O(8)  | 1.588(3)  |       |
|                   | V(3)-O(12) | 1.590(3)  |       |
|                   | V(4)-O(16) | 1.586(3)  |       |
| V-O               | V(1)-O(2)  | 1.788(3)  | 1.707 |
|                   | V(1)-O(3)  | 1.926(3)  | 1.963 |
|                   | V(2)-O(2)  | 1.921(3)  | 1.708 |
|                   | V(2)-O(9)  | 1.788(3)  | 1.962 |
|                   | V(3)-O(13) | 1.788(3)  | 1.708 |
|                   | V(3)-O(9)  | 1.930(3)  | 1.964 |
|                   | V(4)-O(3)  | 1.784(3)  | 1.707 |
|                   | V(4)-O(13) | 1.935(3)  | 1.964 |
| V-O (carboxylate) | V(1)-O(6)  | 1.994(3)  | 2.020 |
|                   | V(1)-O(4)  | 1.999(3)  | 2.023 |
|                   | V(2)-O(10) | 1.995(3)  | 2.017 |
|                   | V(2)-O(5)  | 2.005(3)  | 2.027 |
|                   | V(3)-O(11) | 1.993(3)  | 2.018 |
|                   | V(3)-O(14) | 2.001(3)  | 2.026 |
|                   | V(4)-O(7)  | 1.993(3)  | 2.019 |
|                   | V(4)-O(15) | 2.015(3)  | 2.024 |
| V-F               | V(1)-F(1)  | 2.229(2)  | 2.241 |
|                   | V(2)-F(1)  | 2.228(2)  | 2.245 |
|                   | V(3)-F(1)  | 2.243(2)  | 2.246 |
|                   | V(4)-F(1)  | 2.216(2)  | 2.246 |

**Figure S6.** Optimised structure of **2ic**, an isomer of  $[\text{V}_8\text{O}_{16}(\text{glut})_4\text{C}2\text{Cl}]^{2-}$ , **2ic**.

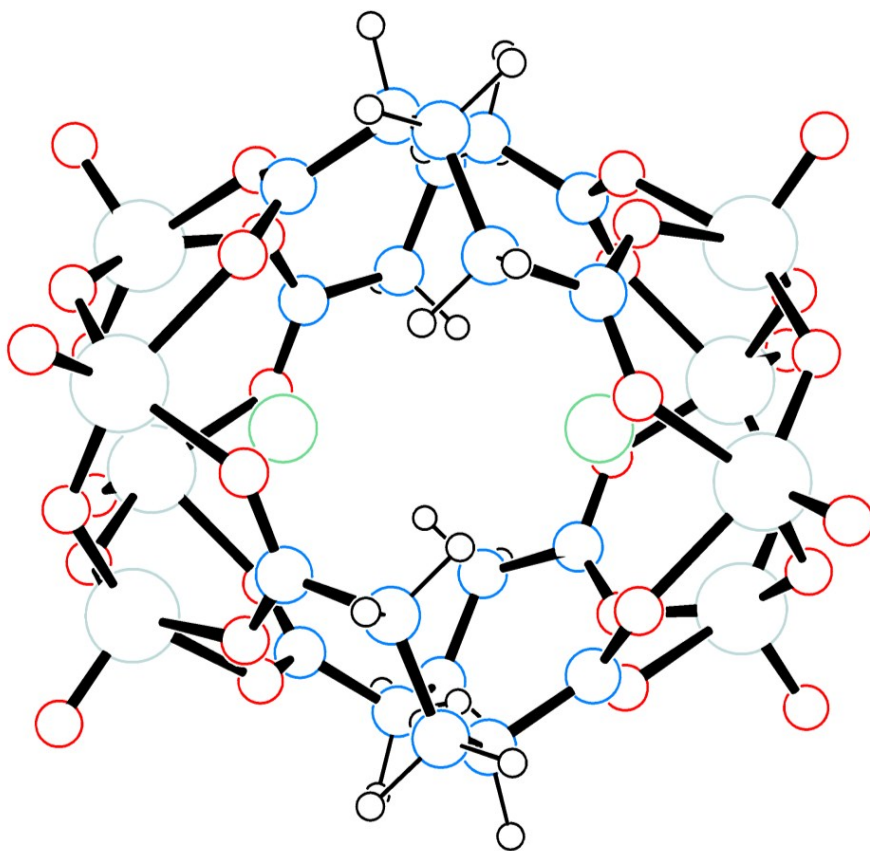

**Figure S7.** Optimised structures of  $[V_8O_{16}(oda)_4]$ , **4c**, and  $[V_8O_{16}(glut)_4]$ , **5c**.

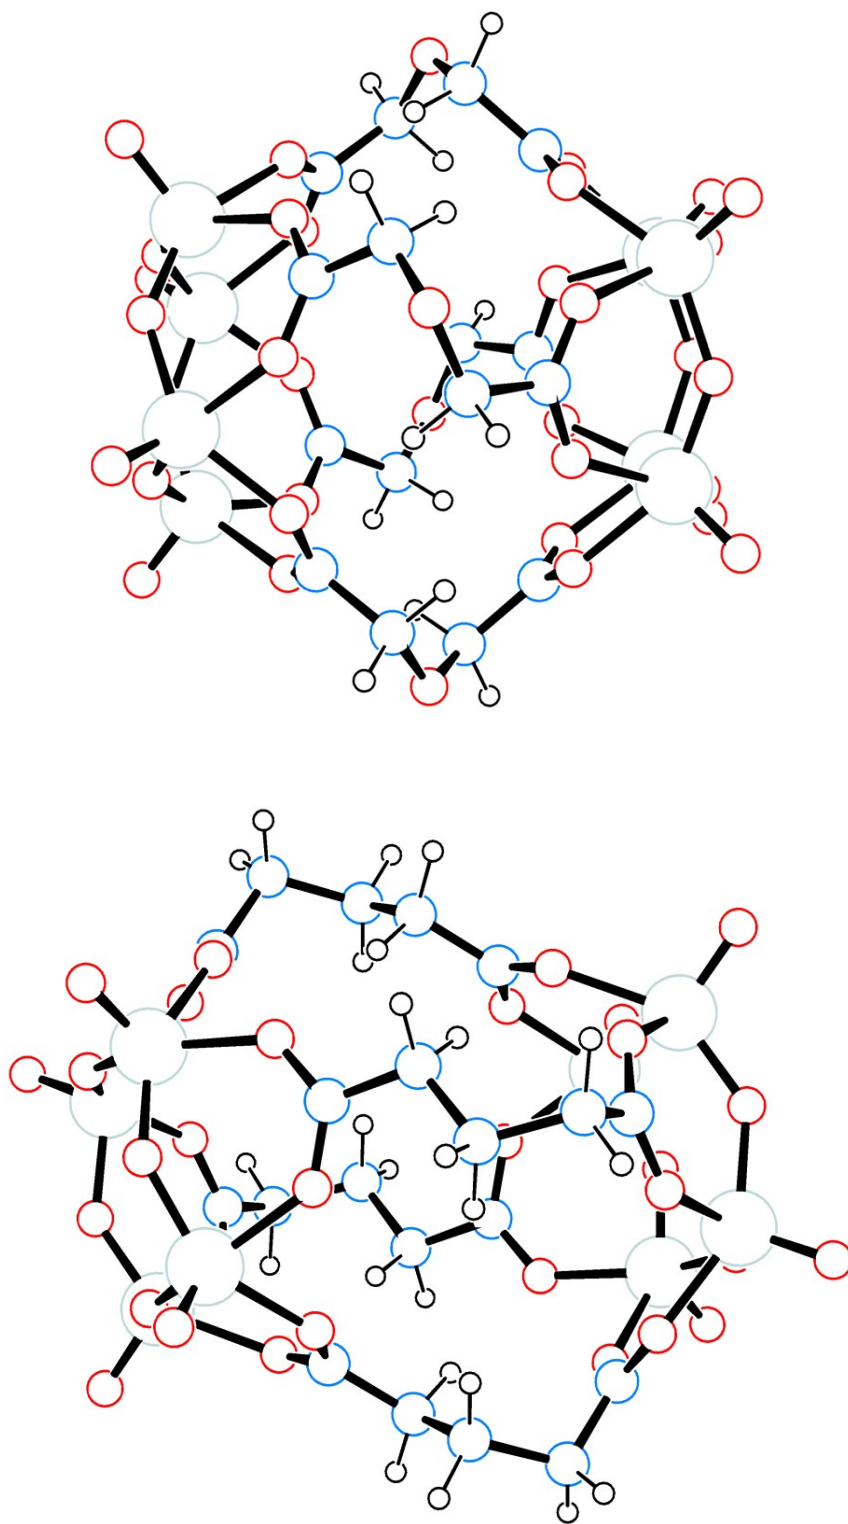

**Figure S8.** Left: HOMO-6 of  $[\text{V}_8\text{O}_{16}(\text{oda})_4\text{Cl}_2]^{2-}$ , **1c**. Right: HOMO-5 of  $[\text{V}_8\text{O}_{16}(\text{glut})_4\text{Cl}_2]^{2-}$ , **2c**.

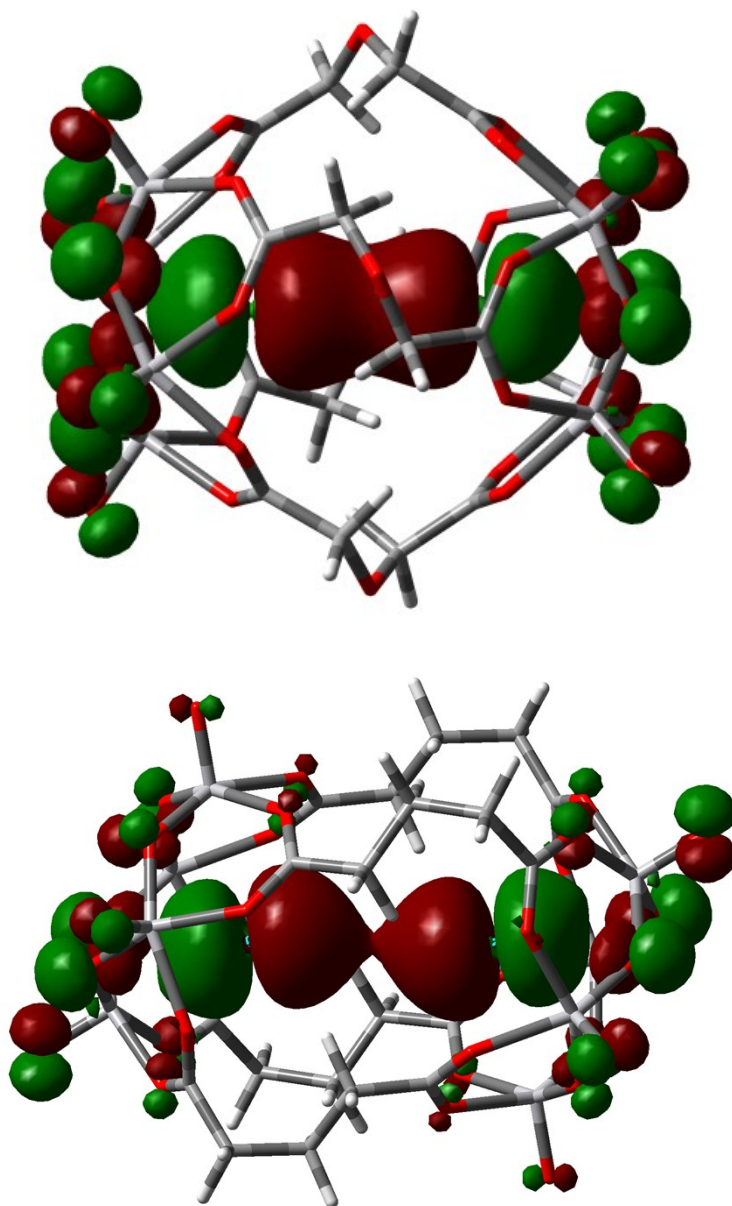

**Figure S9.** Optimised structures of  $[V_8O_{16}(oda)_4\subset(Cl_2)]$ , **6c**, and  $[V_8O_{16}(glut)_4\subset(Cl_2)]$ , **7c**.

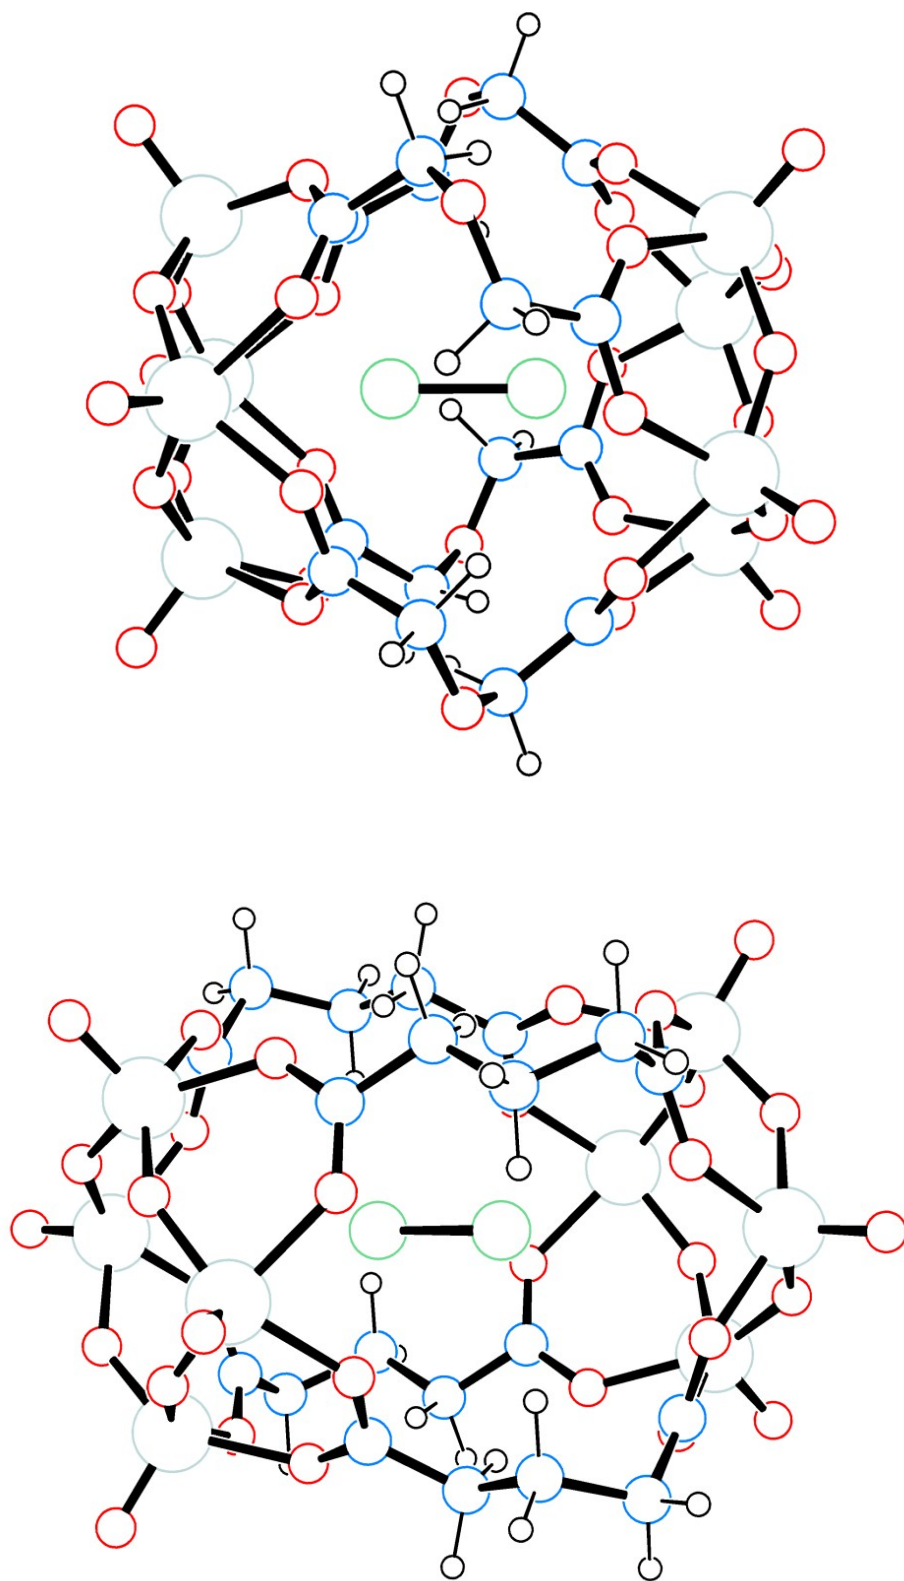

**Figure S10.** Optimised structure of  $[\text{V}_8\text{O}_{16}(\text{glut})_4\subset 2\text{F}]^{2-}$ , **8c**.

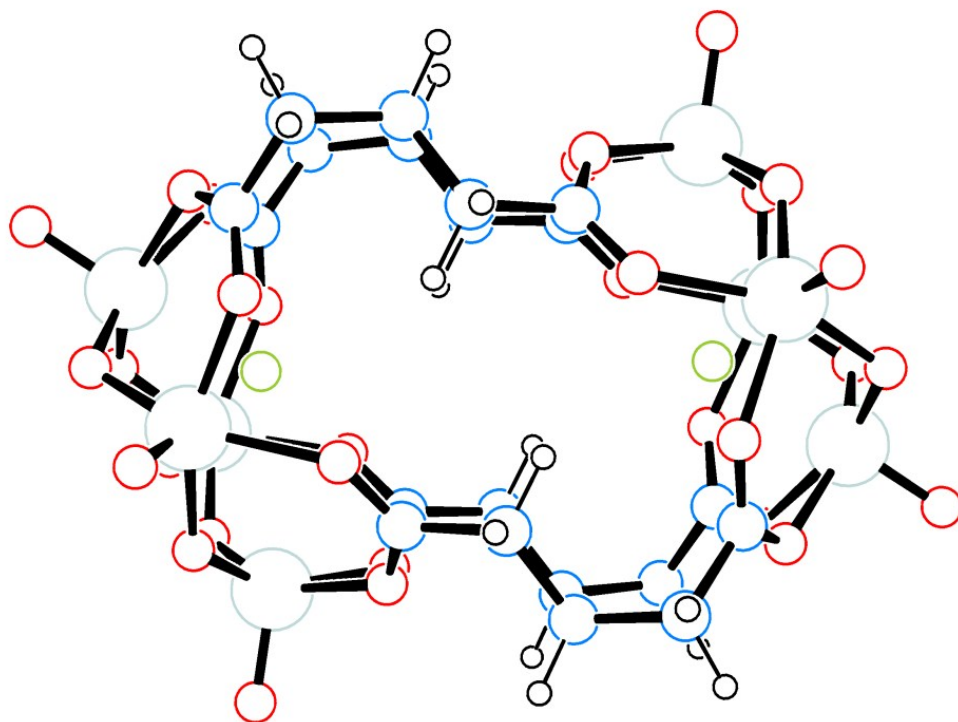



**Figure S11.** Thermogravimetric analyses for complexes **1-3**.

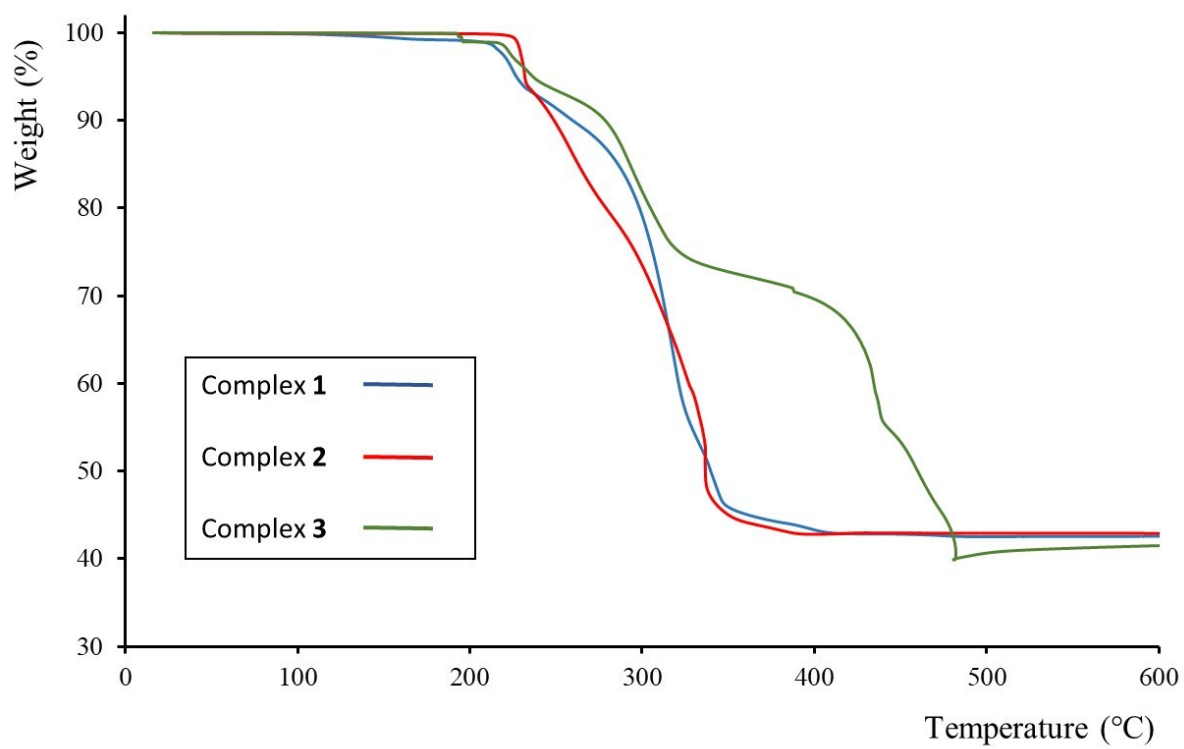

**Figure S12.** Comparison of the XRPDs for complexes **1-3**.

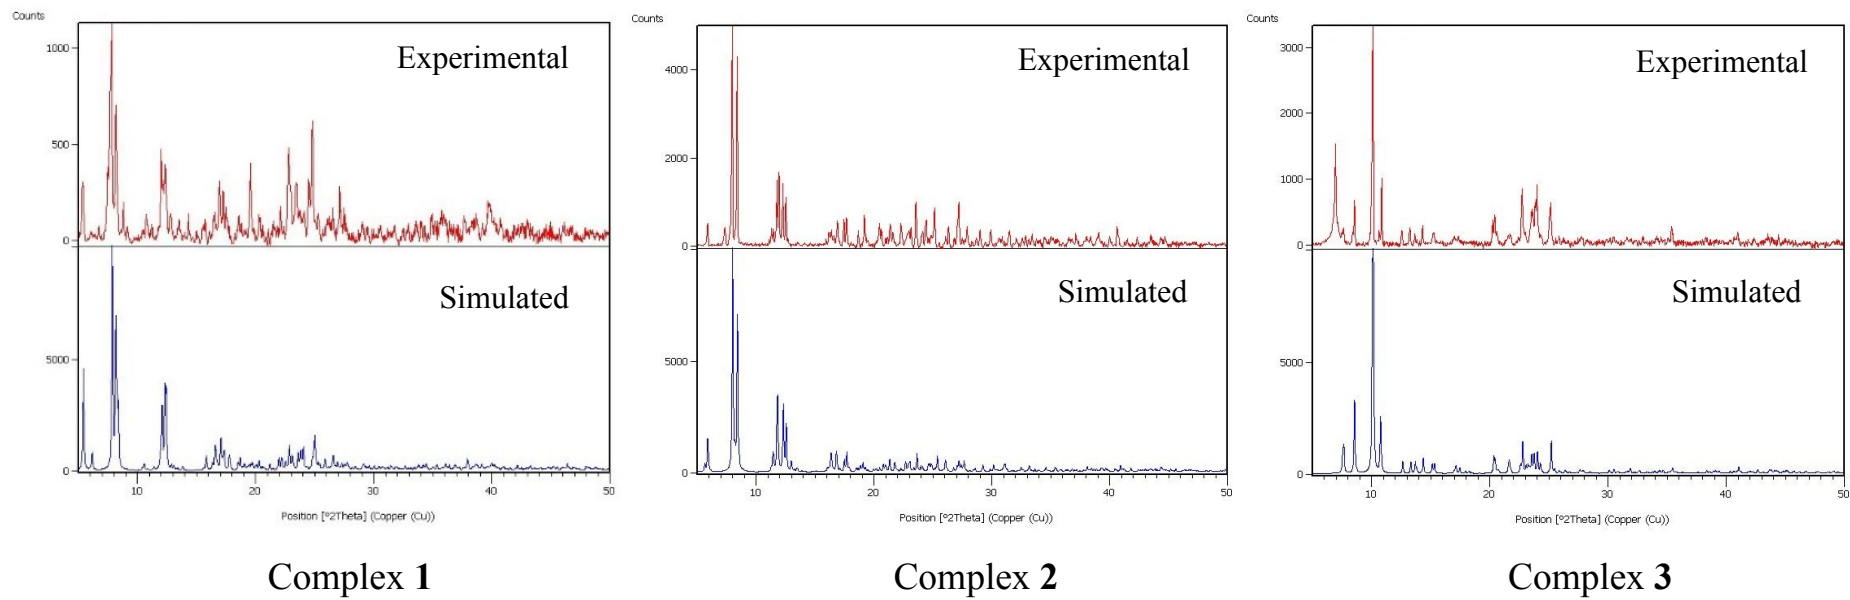

**Table S5.** Fractional coordinates of the computed compounds.

**Anion of complex 1,  $[V_8O_{16}(oda)_4\subset 2Cl]^{2-}$**

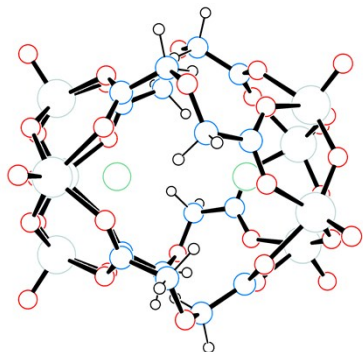

|   |             |             |             |
|---|-------------|-------------|-------------|
| V | 3.72893500  | 2.22653800  | 0.64268800  |
| V | 3.72870400  | 0.64227800  | -2.22650000 |
| V | 3.72852700  | -2.22689100 | -0.64266400 |
| V | 3.72832900  | -0.64288500 | 2.22659200  |
| V | -3.72956400 | -2.28547900 | 0.37916800  |
| V | -3.72908600 | -0.37889700 | -2.28561900 |
| V | -3.72879800 | 2.28611200  | -0.37924000 |
| V | -3.72875300 | 0.37938300  | 2.28556400  |
| O | 2.23419200  | -3.14269100 | 0.33302400  |
| O | 2.27719100  | -2.12409600 | 2.35802100  |
| O | 0.00024000  | -3.52739000 | 3.13995900  |
| O | -2.27863800 | -2.59002700 | 1.83823400  |
| O | -2.23327000 | -0.69414800 | 3.08124100  |
| O | 2.27816800  | 2.35830400  | 2.12426600  |
| O | 2.23397000  | 0.33303100  | 3.14216500  |
| O | 0.00113200  | 3.14093000  | 3.52656700  |
| O | -2.23305200 | 3.08175300  | 0.69400200  |
| O | -2.27699900 | 1.83782200  | 2.58930000  |
| O | 2.23490400  | 3.14253700  | -0.33301700 |
| O | 2.27774400  | 2.12387700  | -2.35800300 |
| O | 0.00081000  | 3.52695900  | -3.13968800 |
| O | -2.23329200 | 0.69426300  | -3.08160300 |
| O | -2.27736600 | 2.58964800  | -1.83780400 |
| O | 2.23467900  | -0.33341300 | -3.14271200 |
| O | 2.27783300  | -2.35852000 | -2.12437100 |
| O | 0.00024700  | -3.13999100 | -3.52648700 |
| O | -2.23406900 | -3.08160800 | -0.69401400 |
| O | -2.27789400 | -1.83770700 | -2.58936300 |
| O | 4.57697000  | 3.47626200  | 1.06934000  |
| O | 4.57633600  | 1.06917200  | -3.47643000 |
| O | 4.57617300  | -3.47692800 | -1.06916700 |
| O | 4.57579400  | -1.06962100 | 3.47667700  |
| O | 4.39848500  | 1.72032700  | -0.86117000 |
| O | 4.39845200  | -0.86166900 | -1.72075900 |
| O | 4.39804100  | -1.72094200 | 0.86134200  |
| O | 4.39813000  | 0.86097100  | 1.72079600  |
| O | -4.57656800 | -3.57692400 | 0.65793800  |
| O | -4.57560600 | -0.65769000 | -3.57736500 |
| O | -4.57534200 | 3.57784000  | -0.65806600 |
| O | -4.57511100 | 0.65848700  | 3.57737600  |
| O | -4.39973900 | -1.60994500 | -1.05607700 |
| O | -4.39921300 | 1.05659100  | -1.61046900 |
| O | -4.39901600 | 1.61080900  | 1.05611300  |
| O | -4.39955000 | -1.05569400 | 1.61043500  |
| C | 1.79322800  | -2.91139900 | 1.50774500  |

|    |             |             |             |
|----|-------------|-------------|-------------|
| C  | 0.51858600  | -3.69036200 | 1.83688200  |
| H  | -0.22138800 | -3.43485300 | 1.06955300  |
| H  | 0.74721200  | -4.75471200 | 1.72619400  |
| C  | -1.79291900 | -1.83471500 | 2.71588900  |
| C  | -0.51787300 | -2.25153200 | 3.45186600  |
| H  | 0.22231900  | -1.46011400 | 3.28714400  |
| H  | -0.74702000 | -2.26447500 | 4.52176700  |
| C  | 1.79376900  | 1.50807100  | 2.91136700  |
| C  | 0.51985200  | 1.83813400  | 3.69126100  |
| H  | -0.22030700 | 1.07019600  | 3.43815500  |
| H  | 0.74996000  | 1.72949400  | 4.75552400  |
| C  | -1.79195000 | 2.71592400  | 1.83408100  |
| C  | -0.51650600 | 3.45149000  | 2.25019300  |
| H  | 0.22371300  | 3.28502100  | 1.45917600  |
| H  | -0.74473800 | 4.52159500  | 2.26142900  |
| C  | 1.79387300  | 2.91122300  | -1.50769900 |
| C  | 0.51935200  | 3.69037500  | -1.83670000 |
| H  | -0.22052100 | 3.43527400  | -1.06913500 |
| H  | 0.74825900  | 4.75470600  | -1.72639100 |
| C  | -1.79227900 | 1.83442300  | -2.71587100 |
| C  | -0.51700900 | 2.25094800  | -3.45149200 |
| H  | 0.22314900  | 1.45960600  | -3.28616300 |
| H  | -0.74565400 | 2.26342500  | -4.52149600 |
| C  | 1.79369800  | -1.50812100 | -2.91143900 |
| C  | 0.51900500  | -1.83716900 | -3.69031100 |
| H  | -0.22072800 | -1.06942600 | -3.43530900 |
| H  | 0.74778400  | -1.72721000 | -4.75471500 |
| C  | -1.79286900 | -2.71576100 | -1.83413200 |
| C  | -0.51734700 | -3.45114800 | -2.25024600 |
| H  | 0.22279900  | -3.28481700 | -1.45911500 |
| H  | -0.74545800 | -4.52128300 | -2.26181900 |
| Cl | 1.93107700  | -0.00029100 | -0.00080900 |
| Cl | -1.93660300 | -0.00047300 | -0.00005700 |

**Anion of complex 2,  $[V_8O_{16}(\text{glut})_4\text{C}2\text{Cl}]^{2-}$**

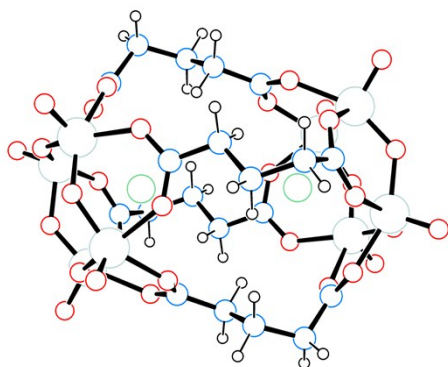

|   |             |             |             |
|---|-------------|-------------|-------------|
| V | -3.12158300 | 2.79317100  | -0.14217300 |
| V | -4.00215400 | 0.52178100  | -2.33994300 |
| V | 3.97910400  | -0.76326300 | -2.29072900 |
| V | 4.87907500  | 1.49282000  | -0.08984100 |
| O | -3.42355500 | 4.33394100  | -0.16422200 |
| O | -4.08687600 | 2.12473800  | -1.40693300 |
| O | -4.77021000 | 0.84088300  | -3.67227100 |
| O | -4.10972900 | 2.17144900  | 1.30307800  |
| O | -1.58257100 | 2.80241100  | 1.21472000  |
| O | -2.13875300 | 1.32900100  | 2.83974700  |
| O | -1.53343600 | 2.73121400  | -1.35420400 |
| O | -2.13567600 | 1.18698800  | -2.89481100 |

|   |             |             |             |
|---|-------------|-------------|-------------|
| O | 4.77849100  | -1.10934700 | -3.59769500 |
| O | 5.14433900  | 0.33314000  | -1.34064600 |
| O | 6.17398600  | 2.38271700  | -0.08299400 |
| O | 5.11942600  | 0.38071500  | 1.37903600  |
| O | 3.18872700  | 1.03451700  | -2.92667700 |
| O | 3.75589300  | 2.57223400  | -1.36121200 |
| O | 3.76848900  | 2.62302800  | 1.23473000  |
| O | 3.13048200  | 1.20607300  | 2.88495500  |
| C | -1.33501400 | 2.12648900  | 2.24994200  |
| C | 0.05454700  | 2.22191800  | 2.85160700  |
| H | 0.56378100  | 1.29140300  | 2.57177300  |
| H | -0.04544800 | 2.19132400  | 3.94188000  |
| C | 0.86967500  | 3.43160000  | 2.38797800  |
| H | 0.37631100  | 4.35499400  | 2.71347100  |
| H | 0.89035800  | 3.45981800  | 1.29528700  |
| C | 2.31786600  | 3.43838300  | 2.92946500  |
| H | 2.78837100  | 4.39561600  | 2.68945600  |
| H | 2.31921600  | 3.30141900  | 4.01566400  |
| C | 3.15436400  | 2.33712700  | 2.29921500  |
| C | -1.31432600 | 1.98981000  | -2.36468800 |
| C | 0.07638600  | 2.04056400  | -2.97090300 |
| H | -0.02402200 | 1.92222800  | -4.05496500 |
| H | 0.58643900  | 1.13610100  | -2.61622700 |
| C | 0.89123900  | 3.28467000  | -2.60699200 |
| H | 0.90905600  | 3.40390800  | -1.52067000 |
| H | 0.39950600  | 4.17801400  | -3.00999400 |
| C | 2.34085000  | 3.24622700  | -3.14272200 |
| H | 2.34599700  | 3.02377200  | -4.21449300 |
| H | 2.81184900  | 4.21913800  | -2.97750800 |
| C | 3.17330500  | 2.19438200  | -2.42812000 |
| V | 3.12153600  | -2.79300700 | 0.14212200  |
| V | 4.00212600  | -0.52184500 | 2.33987900  |
| V | -3.97918000 | 0.76333900  | 2.29075000  |
| V | -4.87874000 | -1.49271000 | 0.08991600  |
| O | 3.42342800  | -4.33379000 | 0.16418900  |
| O | 4.08694700  | -2.12471000 | 1.40696500  |
| O | 4.77019800  | -0.84078900 | 3.67222900  |
| O | 4.10976900  | -2.17139300 | -1.30304500 |
| O | 1.58257800  | -2.80253500 | -1.21484600 |
| O | 2.13877600  | -1.32909700 | -2.83982700 |
| O | 1.53343000  | -2.73105900 | 1.35423800  |
| O | 2.13581800  | -1.18715500 | 2.89509700  |
| O | -4.77853300 | 1.10951100  | 3.59771600  |
| O | -5.14441500 | -0.33316500 | 1.34076000  |
| O | -6.17351900 | -2.38279100 | 0.08294100  |
| O | -5.11945900 | -0.38057400 | -1.37905200 |
| O | -3.18886300 | -1.03450400 | 2.92687000  |
| O | -3.75575700 | -2.57224200 | 1.36132600  |
| O | -3.76850600 | -2.62311300 | -1.23493900 |
| O | -3.13062000 | -1.20610500 | -2.88515500 |
| C | 1.33499100  | -2.12653500 | -2.25000700 |
| C | -0.05456500 | -2.22192300 | -2.85167800 |
| H | -0.56377900 | -1.29140800 | -2.57180700 |
| H | 0.04542700  | -2.19128300 | -3.94195200 |
| C | -0.86971300 | -3.43161300 | -2.38811200 |
| H | -0.37632300 | -4.35500100 | -2.71358000 |
| H | -0.89047800 | -3.45984200 | -1.29542200 |
| C | -2.31786500 | -3.43837500 | -2.92970100 |
| H | -2.78838100 | -4.39562700 | -2.68978500 |
| H | -2.31914000 | -3.30134000 | -4.01589000 |
| C | -3.15440400 | -2.33717500 | -2.29941000 |

|    |             |             |             |
|----|-------------|-------------|-------------|
| C  | 1.31437200  | -1.98978900 | 2.36482100  |
| C  | -0.07632200 | -2.04054700 | 2.97106700  |
| H  | 0.02409300  | -1.92223900 | 4.05513100  |
| H  | -0.58635600 | -1.13606500 | 2.61641500  |
| C  | -0.89120900 | -3.28462400 | 2.60713100  |
| H  | -0.90908000 | -3.40381000 | 1.52080300  |
| H  | -0.39947600 | -4.17799400 | 3.01007400  |
| C  | -2.34079600 | -3.24615600 | 3.14292000  |
| H  | -2.34589800 | -3.02365400 | 4.21468100  |
| H  | -2.81180500 | -4.21907300 | 2.97776700  |
| C  | -3.17326900 | -2.19434500 | 2.42828800  |
| Cl | 2.30425800  | 0.09142700  | 0.00171800  |
| Cl | -2.30470000 | -0.09196100 | -0.00176800 |

**Isomer of the anion of complex 2,  $[V_8O_{16}(\text{glut})_4\subset 2\text{Cl}]^{2-}$**

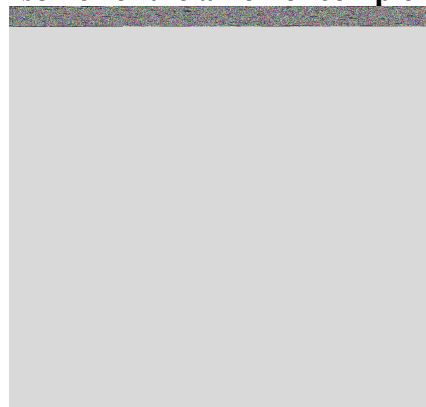

|   |             |             |             |
|---|-------------|-------------|-------------|
| V | 3.71508300  | 2.25563000  | 0.52051100  |
| V | 3.71505500  | 0.52044900  | -2.25553300 |
| V | 3.71504900  | -2.25557000 | -0.52044500 |
| V | 3.71505100  | -0.52049700 | 2.25566100  |
| V | -3.71520700 | -2.23095700 | 0.61761400  |
| V | -3.71516500 | -0.61763600 | -2.23099900 |
| V | -3.71522400 | 2.23102500  | -0.61768200 |
| V | -3.71524500 | 0.61765100  | 2.23097700  |
| O | 2.22649700  | -3.11791100 | 0.50061800  |
| O | 2.27722300  | -1.99798900 | 2.46501600  |
| O | -2.27689900 | -2.37595400 | 2.10319700  |
| O | -2.22629300 | -0.36438500 | 3.13605000  |
| O | 2.27722000  | 2.46496200  | 1.99799700  |
| O | 2.22644600  | 0.50054700  | 3.11788800  |
| O | -2.22622700 | 3.13600500  | 0.36436300  |
| O | -2.27687200 | 2.10316000  | 2.37593200  |
| O | 2.22657400  | 3.11798900  | -0.50054400 |
| O | 2.27730700  | 1.99809400  | -2.46496100 |
| O | -2.22615500 | 0.36441300  | -3.13598600 |
| O | -2.27682400 | 2.37597500  | -2.10312900 |
| O | 2.22658000  | -0.50062400 | -3.11797300 |
| O | 2.27731400  | -2.46503600 | -1.99806700 |
| O | -2.22625600 | -3.13605900 | -0.36442300 |
| O | -2.27684700 | -2.10318400 | -2.37597900 |
| O | 4.56158200  | 3.52952900  | 0.88168800  |
| O | 4.56150600  | 0.88164500  | -3.52946000 |
| O | 4.56149600  | -3.52952500 | -0.88154700 |
| O | 4.56151800  | -0.88159900 | 3.52960100  |
| O | 4.39164700  | 1.67106900  | -0.95104200 |
| O | 4.39168500  | -0.95112900 | -1.67104800 |
| O | 4.39159100  | -1.67105600 | 0.95116900  |

|    |             |             |             |
|----|-------------|-------------|-------------|
| O  | 4.39154900  | 0.95110300  | 1.67111700  |
| O  | -4.56143900 | -3.48811300 | 1.03398600  |
| O  | -4.56137000 | -1.03397600 | -3.48818200 |
| O  | -4.56147800 | 3.48817200  | -1.03403100 |
| O  | -4.56150300 | 1.03404500  | 3.48810700  |
| O  | -4.39191300 | -1.71100100 | -0.87777200 |
| O  | -4.39185600 | 0.87776000  | -1.71104800 |
| O  | -4.39188900 | 1.71102000  | 0.87769100  |
| O  | -4.39194500 | -0.87771600 | 1.71100100  |
| C  | 1.78620200  | -2.84147200 | 1.66808400  |
| C  | 0.55506300  | -3.62621900 | 2.08918700  |
| H  | -0.21439700 | -3.44016900 | 1.33309600  |
| H  | 0.81474600  | -4.68768000 | 1.99300000  |
| C  | -1.78588200 | -1.54286500 | 2.91086800  |
| C  | -0.55443100 | -1.92837200 | 3.71312600  |
| H  | 0.21475500  | -1.18110200 | 3.49331900  |
| H  | -0.81378600 | -1.78482600 | 4.76930900  |
| C  | 1.78618400  | 1.66803300  | 2.84146800  |
| C  | 0.55505700  | 2.08915000  | 3.62622700  |
| H  | -0.21441700 | 1.33307300  | 3.44018500  |
| H  | 0.81474900  | 1.99296000  | 4.68768600  |
| C  | -1.78584400 | 2.91083300  | 1.54285300  |
| C  | -0.55441200 | 3.71310800  | 1.92838500  |
| H  | 0.21478600  | 3.49333500  | 1.18111600  |
| H  | -0.81379400 | 4.76928700  | 1.78485700  |
| C  | 1.78628100  | 2.84155900  | -1.66802300 |
| C  | 0.55513500  | 3.62630400  | -2.08910800 |
| H  | -0.21432000 | 3.44024300  | -1.33301400 |
| H  | 0.81480900  | 4.68776800  | -1.99291700 |
| C  | -1.78577800 | 1.54289900  | -2.91080000 |
| C  | -0.55433200 | 1.92844300  | -3.71304800 |
| H  | 0.21487000  | 1.18118900  | -3.49324200 |
| H  | -0.81368300 | 1.78489400  | -4.76923200 |
| C  | 1.78628200  | -1.66809600 | -2.84153400 |
| C  | 0.55512800  | -2.08918500 | -3.62626500 |
| H  | -0.21432000 | -1.33308500 | -3.44019900 |
| H  | 0.81479000  | -1.99300200 | -4.68773200 |
| C  | -1.78583000 | -2.91086000 | -1.54289100 |
| C  | -0.55436600 | -3.71309900 | -1.92839400 |
| H  | 0.21481900  | -3.49326200 | -1.18113000 |
| H  | -0.81369900 | -4.76928300 | -1.78482300 |
| C  | 0.00072400  | 3.34119100  | -3.49085500 |
| C  | 0.00072000  | -3.49093100 | -3.34113400 |
| C  | 0.00066100  | -3.34110700 | 3.49093900  |
| C  | 0.00067800  | 3.49091200  | 3.34111800  |
| H  | -0.78828800 | 3.69016800  | 4.07523300  |
| H  | 0.79060000  | 4.23244200  | 3.50621100  |
| H  | -0.78831400 | -4.07521800 | 3.69017500  |
| H  | 0.79056500  | -3.50621000 | 4.23248500  |
| H  | -0.78825600 | -3.69018000 | -4.07524100 |
| H  | 0.79062500  | -4.23247900 | -3.50622500 |
| H  | -0.78827500 | 4.07528200  | -3.69007600 |
| H  | 0.79061400  | 3.50632100  | -4.23241000 |
| Cl | 1.92551400  | -0.00010900 | -0.00037800 |
| Cl | -1.92907500 | -0.00023700 | 0.00003200  |

Anion of complex 3,  $[V_4O_8(\text{glut})_2CF]^-$

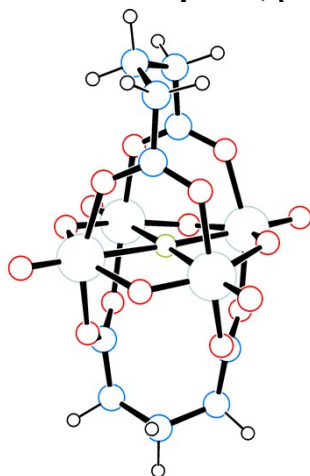

|   |             |             |             |
|---|-------------|-------------|-------------|
| V | -0.04476300 | -2.20971700 | 0.12795100  |
| V | -0.11477400 | -0.09564300 | -2.23770000 |
| V | -0.06546900 | 2.26842200  | -0.11909200 |
| V | 0.22475200  | 0.15250500  | 2.23136600  |
| F | 0.00132900  | 0.02707100  | 0.00050300  |
| O | -0.07639200 | -3.77234200 | 0.30397300  |
| O | -0.39257000 | -1.89899300 | -1.51555200 |
| O | 0.42251700  | -1.51191300 | 1.90312000  |
| O | 1.92655900  | -1.97481700 | -0.22762800 |
| O | 1.84475800  | -0.55608100 | -1.99506700 |
| O | -1.93560000 | -1.81389500 | 0.73008500  |
| O | -1.78245200 | -0.04302400 | 2.13782300  |
| O | -0.18981300 | -0.26812600 | -3.79911800 |
| O | 0.13097500  | 1.56791300  | -1.94243900 |
| O | -2.08483200 | 0.11130800  | -1.85277400 |
| O | -2.02890200 | 1.88224000  | -0.43696700 |
| O | -0.11526300 | 3.83118400  | -0.28667300 |
| O | -0.16114400 | 1.95587800  | 1.55657900  |
| O | 1.93871600  | 2.02222000  | -0.07369000 |
| O | 2.11929600  | 0.61329900  | 1.69369200  |
| O | 0.38181000  | 0.32353200  | 3.78675800  |
| C | 2.45039700  | -1.22016500 | -1.10435400 |
| C | 3.96549200  | -1.08285500 | -1.05048400 |
| H | 4.29235200  | -0.51950800 | -1.92833500 |
| H | 4.38846500  | -2.09203300 | -1.10580500 |
| C | 4.46415700  | -0.41579100 | 0.24988200  |
| H | 4.10001400  | -0.98488000 | 1.10978900  |
| H | 5.55872200  | -0.47724600 | 0.25749100  |
| C | 4.06646600  | 1.06499900  | 0.42014300  |
| H | 4.61136500  | 1.47492800  | 1.27892400  |
| H | 4.32821900  | 1.65371800  | -0.46269600 |
| C | 2.58213700  | 1.25529000  | 0.70412400  |
| C | -2.42150400 | -0.86415600 | 1.41320000  |
| C | -3.93271100 | -0.69200200 | 1.33715000  |
| H | -4.21487000 | 0.16886500  | 1.94855500  |
| H | -4.37891100 | -1.58907100 | 1.78286500  |
| C | -4.45287400 | -0.55389100 | -0.10851800 |
| H | -5.54512500 | -0.64550900 | -0.08775100 |
| H | -4.06727200 | -1.38355100 | -0.70750800 |
| C | -4.10656700 | 0.78000000  | -0.80557100 |
| H | -4.60861900 | 0.80202600  | -1.77911000 |
| H | -4.45428500 | 1.63109500  | -0.21435000 |
| C | -2.61457100 | 0.94730900  | -1.05751200 |



**[V<sub>8</sub>O<sub>16</sub>(oda)<sub>4</sub>], 4c**

|   |             |             |             |
|---|-------------|-------------|-------------|
| V | -3.61675300 | -2.22150400 | -0.85210800 |
| V | -3.61678700 | 0.85224800  | -2.22139100 |
| V | -3.61663200 | 2.22128600  | 0.85216400  |
| V | -3.61680300 | -0.85240700 | 2.22137600  |
| V | 3.61639300  | 1.64720500  | 1.71766300  |
| V | 3.61664600  | 1.71865700  | -1.64512800 |
| V | 3.61704900  | -1.64690200 | -1.71773000 |
| V | 3.61723400  | -1.71853800 | 1.64517600  |
| O | -2.04595100 | 2.22667600  | 2.08728600  |
| O | -2.15321900 | 0.23477300  | 3.15820300  |
| O | 0.00080300  | 0.96345400  | 4.78285000  |
| O | 2.15279700  | 1.00612500  | 3.00109900  |
| O | 2.04655100  | -1.24540000 | 2.78614000  |
| O | -2.15275300 | -3.15809500 | 0.23472800  |
| O | -2.04537400 | -2.08678800 | 2.22643000  |
| O | 0.00034600  | -4.78363800 | 0.96420100  |
| O | 2.04555100  | -2.78656200 | -1.24474700 |
| O | 2.15367600  | -3.00335500 | 1.00652300  |
| O | -2.04590300 | -2.22683100 | -2.08712400 |
| O | -2.15318800 | -0.23495500 | -3.15813500 |
| O | 0.00068800  | -0.96369700 | -4.78283100 |
| O | 2.04520100  | 1.24459600  | -2.78438000 |
| O | 2.15382800  | -1.00652500 | -3.00238900 |
| O | -2.04557100 | 2.08686100  | -2.22672100 |
| O | -2.15257700 | 3.15761700  | -0.23470800 |
| O | -0.00017800 | 4.78393500  | -0.96439700 |
| O | 2.04549400  | 2.78760700  | 1.24479100  |
| O | 2.15344100  | 3.00401700  | -1.00649700 |
| O | -4.51650300 | -3.40829100 | -1.30403900 |
| O | -4.51653800 | 1.30375200  | -3.40834300 |
| O | -4.51631800 | 3.40816900  | 1.30397200  |
| O | -4.51638600 | -1.30395800 | 3.40844300  |
| O | -4.17300100 | -0.81580400 | -1.69366400 |
| O | -4.17308600 | 1.69453400  | -0.81614600 |
| O | -4.17309600 | 0.81560500  | 1.69369600  |
| O | -4.17318100 | -1.69492100 | 0.81627300  |
| O | 4.51640600  | 2.52061600  | 2.63931700  |
| O | 4.51681000  | 2.63662000  | -2.52226500 |
| O | 4.51706600  | -2.52050200 | -2.63920400 |
| O | 4.51806900  | -2.63616200 | 2.52197300  |
| O | 4.17400100  | 1.88129800  | 0.09722300  |
| O | 4.17196200  | 0.09670800  | -1.87375500 |
| O | 4.17442100  | -1.88133900 | -0.09730300 |
| O | 4.17180400  | -0.09637000 | 1.87332000  |
| C | -1.68550500 | 1.38972800  | 2.98397200  |
| C | -0.54121100 | 1.88412400  | 3.86552200  |
| H | 0.22110700  | 2.30301400  | 3.19959300  |
| H | -0.93982700 | 2.70954700  | 4.46471600  |
| C | 1.68552700  | -0.12638500 | 3.28796200  |
| C | 0.54005600  | -0.24063000 | 4.29079800  |
| H | -0.22381300 | -0.88091000 | 3.83628700  |
| H | 0.93613500  | -0.77343300 | 5.16166500  |
| C | -1.68520700 | -2.98384400 | 1.38975900  |
| C | -0.54129000 | -3.86570800 | 1.88449400  |
| H | 0.22133600  | -3.19996100 | 2.30314300  |
| H | -0.94017000 | -4.46437800 | 2.71016900  |
| C | 1.68544700  | -3.28936000 | -0.12580600 |
| C | 0.53999900  | -4.29221900 | -0.23996000 |
| H | -0.22364200 | -3.83803400 | -0.88072100 |

|   |             |             |             |
|---|-------------|-------------|-------------|
| H | 0.93629900  | -5.16337200 | -0.77215800 |
| C | -1.68547200 | -1.38990600 | -2.98383900 |
| C | -0.54112700 | -1.88430300 | -3.86533700 |
| H | 0.22129200  | -2.30293700 | -3.19934400 |
| H | -0.93960500 | -2.70993100 | -4.46433600 |
| C | 1.68539200  | 0.12579900  | -3.28777800 |
| C | 0.54006300  | 0.24032100  | -4.29075100 |
| H | -0.22375100 | 0.88075800  | -3.83639900 |
| H | 0.93643800  | 0.77299300  | -5.16157700 |
| C | -1.68524500 | 2.98368800  | -1.38988600 |
| C | -0.54149400 | 3.86575100  | -1.88461700 |
| H | 0.22131600  | 3.20009000  | -2.30305500 |
| H | -0.94040000 | 4.46420800  | -2.71043200 |
| C | 1.68522800  | 3.29016200  | 0.12578000  |
| C | 0.53962000  | 4.29283500  | 0.23982200  |
| H | -0.22389800 | 3.83863200  | 0.88071500  |

### [V<sub>8</sub>O<sub>16</sub>(glut)<sub>4</sub>], 5c

|   |             |             |             |
|---|-------------|-------------|-------------|
| V | -2.97158100 | 0.15439400  | -2.86024500 |
| V | -3.92835200 | -2.34011700 | -0.81096700 |
| V | 3.91876100  | -2.41711900 | 0.55965700  |
| V | 4.86345400  | 0.07597200  | -1.48864300 |
| O | -3.29023500 | 0.25997800  | -4.38267100 |
| O | -3.88556000 | -1.17081900 | -2.22970800 |
| O | -4.74967600 | -3.57623100 | -1.28576000 |
| O | -3.91132600 | 1.48082300  | -2.02090500 |
| O | -1.41604400 | 1.43728100  | -2.59027600 |
| O | -2.03299300 | 2.91966100  | -1.00023200 |
| O | -1.37457100 | -1.05742200 | -2.78312400 |
| O | -2.01593100 | -2.70849500 | -1.38019300 |
| O | 4.75673300  | -3.69967900 | 0.84329400  |
| O | 4.97597900  | -1.26993100 | -0.40066200 |
| O | 6.19970600  | 0.14289500  | -2.28637400 |
| O | 4.95744500  | 1.37661400  | -0.19183200 |
| O | 3.10463800  | -2.78653000 | -1.26085400 |
| O | 3.68363900  | -1.07473500 | -2.62027200 |
| O | 3.65729400  | 1.42261700  | -2.40007900 |
| O | 3.06909700  | 2.98739500  | -0.87769200 |
| C | -1.23517400 | 2.47595700  | -1.89157600 |
| C | 0.06484100  | 3.23937600  | -2.04962600 |
| H | 0.60997700  | 3.10074500  | -1.10696900 |
| H | -0.18497700 | 4.30544200  | -2.07745200 |
| C | 0.92301600  | 2.82444200  | -3.25053600 |
| H | 0.49668400  | 3.23847600  | -4.16959200 |
| H | 0.90294300  | 1.73728900  | -3.36714400 |
| C | 2.39317200  | 3.29686000  | -3.13930400 |
| H | 2.90325200  | 3.11814300  | -4.08830900 |
| H | 2.44240800  | 4.36251800  | -2.89945300 |
| C | 3.11998200  | 2.52019300  | -2.06178200 |
| C | -1.20922300 | -2.17629800 | -2.20401700 |
| C | 0.09039900  | -2.91941100 | -2.44469000 |
| H | -0.16062600 | -3.97645000 | -2.58322200 |
| H | 0.63795300  | -2.88062600 | -1.49405600 |
| C | 0.94734700  | -2.38223200 | -3.59732100 |
| H | 0.92906800  | -1.28897300 | -3.59945500 |
| H | 0.51896800  | -2.69767200 | -4.55376700 |
| C | 2.41736100  | -2.86456300 | -3.53969600 |
| H | 2.46671400  | -3.94948400 | -3.41260500 |
| H | 2.92496700  | -2.58774800 | -4.46620100 |
| C | 3.14725500  | -2.20613600 | -2.38795500 |

|   |             |             |             |
|---|-------------|-------------|-------------|
| V | 2.97160000  | -0.15440000 | 2.86025000  |
| V | 3.92835400  | 2.34011700  | 0.81096100  |
| V | -3.91876100 | 2.41711700  | -0.55965900 |
| V | -4.86346700 | -0.07596600 | 1.48863600  |
| O | 3.29026800  | -0.25997800 | 4.38267300  |
| O | 3.88557400  | 1.17081000  | 2.22969400  |
| O | 4.74967200  | 3.57623200  | 1.28575700  |
| O | 3.91133500  | -1.48083500 | 2.02091100  |
| O | 1.41605800  | -1.43728300 | 2.59029000  |
| O | 2.03299500  | -2.91965900 | 1.00024000  |
| O | 1.37459300  | 1.05742400  | 2.78315100  |
| O | 2.01593400  | 2.70848500  | 1.38019900  |
| O | -4.75672700 | 3.69967800  | -0.84330800 |
| O | -4.97599400 | 1.26994100  | 0.40066200  |
| O | -6.19972400 | -0.14290400 | 2.28635900  |
| O | -4.95744000 | -1.37660100 | 0.19181400  |
| O | -3.10464200 | 2.78652400  | 1.26085400  |
| O | -3.68366700 | 1.07474200  | 2.62027700  |
| O | -3.65730700 | -1.42261100 | 2.40007100  |
| O | -3.06910900 | -2.98739500 | 0.87769100  |
| C | 1.23518400  | -2.47596100 | 1.89159500  |
| C | -0.06484300 | -3.23936200 | 2.04963000  |
| H | -0.60997000 | -3.10072800 | 1.10696800  |
| H | 0.18496700  | -4.30543000 | 2.07745900  |
| C | -0.92302500 | -2.82442000 | 3.25053400  |
| H | -0.49669300 | -3.23844800 | 4.16959300  |
| H | -0.90295600 | -1.73726800 | 3.36713500  |
| C | -2.39317900 | -3.29684800 | 3.13930300  |
| H | -2.90326000 | -3.11813100 | 4.08830800  |
| H | -2.44240900 | -4.36250700 | 2.89945600  |
| C | -3.12000100 | -2.52019200 | 2.06178100  |
| C | 1.20924000  | 2.17630000  | 2.20404400  |
| C | -0.09039500 | 2.91939600  | 2.44469600  |
| H | 0.16062200  | 3.97643700  | 2.58323300  |
| H | -0.63793700 | 2.88061100  | 1.49405500  |
| C | -0.94735600 | 2.38221300  | 3.59731700  |
| H | -0.92908400 | 1.28895300  | 3.59944400  |
| H | -0.51897700 | 2.69764100  | 4.55376700  |
| C | -2.41736700 | 2.86455800  | 3.53969600  |
| H | -2.46670900 | 3.94948000  | 3.41260400  |
| H | -2.92497200 | 2.58774900  | 4.46620200  |
| C | -3.14727800 | 2.20614000  | 2.38796000  |

**[V<sub>8</sub>O<sub>16</sub>(oda)<sub>4</sub>Cl<sub>2</sub>], 6c**

|   |             |             |             |
|---|-------------|-------------|-------------|
| V | 3.64945900  | -1.43128600 | 1.92118800  |
| V | 3.65266400  | 1.91933000  | 1.43107600  |
| V | 3.65944700  | 1.42850300  | -1.91395900 |
| V | 3.65648100  | -1.92337800 | -1.42355200 |
| V | -3.64865800 | 0.49498100  | -2.34504100 |
| V | -3.65022400 | 2.34488300  | 0.48832100  |
| V | -3.65826300 | -0.48861700 | 2.33919400  |
| V | -3.65790000 | -2.33883500 | -0.49549400 |
| O | 2.12915300  | 0.77778300  | -3.02442400 |
| O | 2.18869100  | -1.47828800 | -2.79356400 |
| O | 0.00744500  | -1.72402400 | -4.54263600 |
| O | -2.17991600 | -0.74550000 | -3.07856100 |
| O | -2.12349500 | -2.58598600 | -1.75284400 |
| O | 2.17735600  | -2.79797600 | 1.47846900  |
| O | 2.12148300  | -3.02887400 | -0.77755900 |
| O | -0.00645100 | -4.54639000 | 1.71947700  |

|    |             |             |             |
|----|-------------|-------------|-------------|
| O  | -2.12931400 | -1.75218500 | 2.58598500  |
| O  | -2.19147300 | -3.07708900 | 0.74495300  |
| O  | 2.11474700  | -0.77947200 | 3.02387400  |
| O  | 2.17827700  | 1.47650700  | 2.79523600  |
| O  | -0.00123200 | 1.72334500  | 4.54791500  |
| O  | -2.11930000 | 2.58632800  | 1.74947400  |
| O  | -2.18638600 | 0.74694600  | 3.07627100  |
| O  | 2.12099700  | 3.02517300  | 0.77917800  |
| O  | 2.18729900  | 2.79642400  | -1.47669000 |
| O  | 0.00721300  | 4.54893700  | -1.72541100 |
| O  | -2.11317400 | 1.75115300  | -2.58614300 |
| O  | -2.17647900 | 3.07799000  | -0.74683300 |
| O  | 4.57020500  | -2.18987600 | 2.92071000  |
| O  | 4.57436300  | 2.91025400  | 2.19974100  |
| O  | 4.58641100  | 2.18477300  | -2.90951300 |
| O  | 4.58120800  | -2.91448400 | -2.18830000 |
| O  | 4.19041100  | 0.20448400  | 1.85782200  |
| O  | 4.20074700  | 1.86672400  | -0.20285700 |
| O  | 4.19681100  | -0.20811700 | -1.84625700 |
| O  | 4.19770500  | -1.87051500 | 0.21265800  |
| O  | -4.56973000 | 0.73673900  | -3.57603300 |
| O  | -4.57250300 | 3.57567700  | 0.72665600  |
| O  | -4.58539300 | -0.72660100 | 3.56639100  |
| O  | -4.58452100 | -3.56592800 | -0.73588500 |
| O  | -4.19145400 | 1.53488900  | -1.08193300 |
| O  | -4.19587500 | 1.08143800  | 1.52629500  |
| O  | -4.19976600 | -1.52556200 | 1.07315600  |
| O  | -4.19580100 | -1.07345200 | -1.53498700 |
| C  | 1.73662400  | -0.41046400 | -3.28611600 |
| C  | 0.55608700  | -0.45958700 | -4.25669200 |
| H  | -0.19717000 | 0.24119800  | -3.87832200 |
| H  | 0.91524600  | -0.06250500 | -5.21151000 |
| C  | -1.72834800 | -1.87062700 | -2.73633000 |
| C  | -0.54476500 | -2.47831000 | -3.49004000 |
| H  | 0.20514100  | -2.74888100 | -2.73777200 |
| H  | -0.90123400 | -3.41042600 | -3.93990700 |
| C  | 1.72604700  | -3.28972300 | 0.41007100  |
| C  | 0.54311000  | -4.25745900 | 0.45621100  |
| H  | -0.20906700 | -3.87486400 | -0.24353500 |
| H  | 0.89994700  | -5.21175800 | 0.05583400  |
| C  | -1.73823300 | -2.73685900 | 1.87008200  |
| C  | -0.55712500 | -3.49513100 | 2.47678600  |
| H  | 0.19418500  | -2.74550200 | 2.75069700  |
| H  | -0.91546300 | -3.94747500 | 3.40700700  |
| C  | 1.72476100  | 0.40923800  | 3.28735800  |
| C  | 0.54671900  | 0.45895500  | 4.26082300  |
| H  | -0.20768600 | -0.24190200 | 3.88503900  |
| H  | 0.90885100  | 0.06235100  | 5.21474400  |
| C  | -1.73102400 | 1.87114700  | 2.73570900  |
| C  | -0.55156300 | 2.47908300  | 3.49548800  |
| H  | 0.20035300  | 2.75348000  | 2.74669100  |
| H  | -0.91214200 | 3.40899600  | 3.94671500  |
| C  | 1.73272900  | 3.28916300  | -0.40997700 |
| C  | 0.55551800  | 4.26348700  | -0.46083000 |
| H  | -0.19863400 | 3.88921900  | 0.24114700  |
| H  | 0.91852700  | 5.21779100  | -0.06587900 |
| C  | -1.72269700 | 2.73689400  | -1.87138900 |
| C  | -0.54289700 | 3.49551800  | -2.48003300 |
| H  | 0.20914200  | 2.74639600  | -2.75317400 |
| H  | -0.90305000 | 3.94556500  | -3.41067100 |
| C1 | 1.00893600  | -0.00523200 | -0.01129500 |

|    |             |             |            |
|----|-------------|-------------|------------|
| C1 | -1.01904000 | -0.01264800 | 0.00633300 |
|----|-------------|-------------|------------|

**[V<sub>8</sub>O<sub>16</sub>(glut)<sub>4</sub>(Cl<sub>2</sub>)]<sub>7c</sub>**

|   |             |             |             |
|---|-------------|-------------|-------------|
| V | 3.16414900  | -0.26911800 | 2.76483600  |
| V | 4.03775900  | -2.44482000 | 0.35199400  |
| V | -4.00312600 | -2.34420200 | -0.79468700 |
| V | -4.63708000 | -0.17826800 | 1.66232700  |
| O | 3.56134300  | -0.37077200 | 4.26862500  |
| O | 4.05761400  | -1.48608900 | 1.92260300  |
| O | 4.95828700  | -3.67874400 | 0.59142200  |
| O | 4.06858300  | 1.15634800  | 2.05709000  |
| O | 1.60927400  | 1.06232900  | 2.79456700  |
| O | 2.18359000  | 2.79181400  | 1.45373400  |
| O | 1.57020300  | -1.48777500 | 2.58678800  |
| O | 2.19797400  | -2.95718600 | 0.98522200  |
| O | -4.90687500 | -3.53202400 | -1.24076700 |
| O | -4.94686700 | -1.36944100 | 0.44430700  |
| O | -5.82863900 | -0.20847100 | 2.66708600  |
| O | -4.91723500 | 1.29014800  | 0.58809700  |
| O | -3.08371500 | -3.07576100 | 0.87647600  |
| O | -3.33834700 | -1.47593300 | 2.45011000  |
| O | -3.23305300 | 1.00954000  | 2.50454500  |
| O | -3.10256700 | 2.95605000  | 1.37008600  |
| C | 1.41605800  | 2.20457000  | 2.28820600  |
| C | 0.13696600  | 2.95676800  | 2.60335000  |
| H | -0.40048000 | 3.02073000  | 1.64838600  |
| H | 0.42101600  | 3.98905600  | 2.83495100  |
| C | -0.75545800 | 2.35638900  | 3.69422100  |
| H | -0.36308600 | 2.61830300  | 4.68141300  |
| H | -0.74513300 | 1.26530700  | 3.63531600  |
| C | -2.21535200 | 2.85871400  | 3.59265300  |
| H | -2.76300100 | 2.55592700  | 4.48953900  |
| H | -2.25435900 | 3.94716900  | 3.50346500  |
| C | -2.92343200 | 2.24280300  | 2.40235500  |
| C | 1.40473400  | -2.53303500 | 1.88284500  |
| C | 0.12085200  | -3.32567700 | 2.03723700  |
| H | 0.39520200  | -4.38585200 | 2.03115600  |
| H | -0.42767800 | -3.17035000 | 1.09875000  |
| C | -0.75543100 | -2.97416800 | 3.24382700  |
| H | -0.75737100 | -1.89387500 | 3.40934300  |
| H | -0.33807000 | -3.42634200 | 4.14877300  |
| C | -2.21233200 | -3.46783000 | 3.07197500  |
| H | -2.23866800 | -4.51315800 | 2.75423100  |
| H | -2.73950800 | -3.37102400 | 4.02463200  |
| C | -2.95378600 | -2.62597400 | 2.05239000  |
| V | -3.16413300 | 0.26911300  | -2.76483600 |
| V | -4.03776300 | 2.44481700  | -0.35199700 |
| V | 4.00315100  | 2.34420100  | 0.79469400  |
| V | 4.63707000  | 0.17826500  | -1.66232800 |
| O | -3.56133000 | 0.37076200  | -4.26862400 |
| O | -4.05760200 | 1.48608300  | -1.92260700 |
| O | -4.95829100 | 3.67873900  | -0.59144000 |
| O | -4.06856200 | -1.15634900 | -2.05708100 |
| O | -1.60925800 | -1.06233700 | -2.79457300 |
| O | -2.18356600 | -2.79181200 | -1.45372600 |
| O | -1.57019100 | 1.48777600  | -2.58678800 |
| O | -2.19796800 | 2.95718500  | -0.98522200 |
| O | 4.90690600  | 3.53201700  | 1.24077300  |
| O | 4.94687800  | 1.36943100  | -0.44430500 |
| O | 5.82861900  | 0.20845200  | -2.66710000 |

|    |             |             |             |
|----|-------------|-------------|-------------|
| O  | 4.91722300  | -1.29015300 | -0.58810500 |
| O  | 3.08374200  | 3.07577300  | -0.87646900 |
| O  | 3.33834900  | 1.47594300  | -2.45010100 |
| O  | 3.23300700  | -1.00951400 | -2.50452000 |
| O  | 3.10253100  | -2.95603900 | -1.37006800 |
| C  | -1.41604200 | -2.20457700 | -2.28821100 |
| C  | -0.13696000 | -2.95678800 | -2.60336900 |
| H  | 0.40048900  | -3.02077600 | -1.64840700 |
| H  | -0.42102700 | -3.98906800 | -2.83498900 |
| C  | 0.75546800  | -2.35640500 | -3.69423800 |
| H  | 0.36312200  | -2.61832300 | -4.68144000 |
| H  | 0.74513600  | -1.26532300 | -3.63533100 |
| C  | 2.21536200  | -2.85869900 | -3.59264700 |
| H  | 2.76303100  | -2.55588900 | -4.48951600 |
| H  | 2.25439500  | -3.94715300 | -3.50346400 |
| C  | 2.92334700  | -2.24276600 | -2.40231000 |
| C  | -1.40472500 | 2.53303500  | -1.88284400 |
| C  | -0.12084900 | 3.32568700  | -2.03724100 |
| H  | -0.39521200 | 4.38585900  | -2.03118000 |
| H  | 0.42767900  | 3.17038600  | -1.09874900 |
| C  | 0.75544400  | 2.97416800  | -3.24382000 |
| H  | 0.75739000  | 1.89387300  | -3.40932600 |
| H  | 0.33808400  | 3.42633100  | -4.14877300 |
| C  | 2.21234200  | 3.46784400  | -3.07196300 |
| H  | 2.23866900  | 4.51317100  | -2.75421500 |
| H  | 2.73951700  | 3.37104700  | -4.02462000 |
| C  | 2.95381400  | 2.62599400  | -2.05238500 |
| Cl | -0.81586500 | 0.00867600  | 0.62062600  |
| Cl | 0.81578800  | -0.00867400 | -0.62065400 |

**[V<sub>8</sub>O<sub>16</sub>(glut)<sub>4</sub>C<sub>2</sub>F]<sup>2-</sup>, 8c**

|   |             |             |             |
|---|-------------|-------------|-------------|
| V | 3.16119800  | -2.84061500 | 0.01897800  |
| V | 3.97740400  | -0.60052400 | -2.19396000 |
| V | -3.98243100 | 0.53874100  | -2.20963100 |
| V | -4.87576200 | -1.41624500 | -0.01731500 |
| O | 3.49069700  | -4.37622000 | 0.01515000  |
| O | 4.10904700  | -2.13995400 | -1.35918300 |
| O | 4.62777900  | -0.92876000 | -3.58692700 |
| O | 4.05727300  | -2.16946800 | 1.33697000  |
| O | 1.53088500  | -2.76914100 | 1.21143000  |
| O | 2.06864700  | -1.14594000 | 2.68784100  |
| O | 1.58376100  | -2.75584500 | -1.25785000 |
| O | 2.05536900  | -1.06807300 | -2.67986600 |
| O | -4.57719500 | 0.97510300  | -3.59801700 |
| O | -5.28789200 | -0.35931400 | -1.48404600 |
| O | -6.12668100 | -2.36937500 | 0.00216000  |
| O | -5.19037900 | -0.36242000 | 1.35527400  |
| O | -3.13625200 | -1.15239200 | -2.90784000 |
| O | -3.82112500 | -2.62307600 | -1.33894600 |
| O | -3.69681500 | -2.56479300 | 1.19096500  |
| O | -3.18912500 | -1.13271800 | 2.86321200  |
| C | 1.29158400  | -2.02283500 | 2.20777200  |
| C | -0.07239200 | -2.14670200 | 2.86670700  |
| H | -0.61512500 | -1.22323400 | 2.63031600  |
| H | 0.08160600  | -2.11866800 | 3.95128300  |
| C | -0.88500600 | -3.37310900 | 2.44297700  |
| H | -0.39342900 | -4.28331200 | 2.80536500  |
| H | -0.89933100 | -3.44614000 | 1.35226000  |
| C | -2.33732000 | -3.35226200 | 2.96986500  |
| H | -2.81277800 | -4.31294600 | 2.75424900  |

|   |             |             |             |
|---|-------------|-------------|-------------|
| H | -2.35179500 | -3.18009300 | 4.05067100  |
| C | -3.15441100 | -2.26274900 | 2.29252700  |
| C | 1.30292500  | -1.97613700 | -2.21549700 |
| C | -0.06690500 | -2.10524100 | -2.85956900 |
| H | 0.07710200  | -2.06894200 | -3.94552300 |
| H | -0.61737700 | -1.18946900 | -2.61284900 |
| C | -0.86025600 | -3.34548700 | -2.43969200 |
| H | -0.90072500 | -3.40446700 | -1.34831700 |
| H | -0.33600000 | -4.24770200 | -2.77519000 |
| C | -2.29849000 | -3.37428100 | -3.00559200 |
| H | -2.28424300 | -3.21466100 | -4.08870000 |
| H | -2.75148500 | -4.34635000 | -2.79383600 |
| C | -3.16601300 | -2.30249500 | -2.36594600 |
| V | -3.16100100 | 2.84351000  | -0.03584900 |
| V | -4.01504900 | 0.65170300  | 2.30040400  |
| V | 4.01939200  | -0.60811300 | 2.31441000  |
| V | 4.87231000  | 1.42559600  | -0.07041600 |
| O | -3.50328700 | 4.37608100  | 0.00778600  |
| O | -4.07958700 | 2.11919400  | 1.37964000  |
| O | -4.75682500 | 0.99586100  | 3.64088900  |
| O | -4.09753400 | 2.17771400  | -1.30751100 |
| O | -1.55073200 | 2.82059500  | -1.21509000 |
| O | -2.01898800 | 1.11712200  | -2.61860800 |
| O | -1.56971200 | 2.71933600  | 1.25961400  |
| O | -2.09361900 | 1.09291600  | 2.73803700  |
| O | 4.74673400  | -1.00901200 | 3.64760400  |
| O | 5.15773800  | 0.30452100  | 1.40994100  |
| O | 6.11854100  | 2.37372600  | 0.07944500  |
| O | 5.32165400  | 0.40792700  | -1.41256100 |
| O | 3.14199700  | 1.08805300  | 2.92221500  |
| O | 3.66846100  | 2.51649900  | 1.25266300  |
| O | 3.82849600  | 2.65754000  | -1.27842200 |
| O | 3.19484000  | 1.19679900  | -2.87779700 |
| C | -1.27037300 | 2.02483500  | -2.17131600 |
| C | 0.10146500  | 2.15802600  | -2.81170700 |
| H | 0.65055300  | 1.24074900  | -2.56816600 |
| H | -0.04296000 | 2.12451700  | -3.89777900 |
| C | 0.89948000  | 3.39493400  | -2.39177000 |
| H | 0.37844600  | 4.29990500  | -2.72470100 |
| H | 0.94504000  | 3.45246500  | -1.30055600 |
| C | 2.33586400  | 3.41569600  | -2.96313400 |
| H | 2.79631500  | 4.38410400  | -2.75007100 |
| H | 2.31702800  | 3.25892900  | -4.04643900 |
| C | 3.19603800  | 2.33291500  | -2.33201600 |
| C | -1.32104400 | 1.97988000  | 2.24987900  |
| C | 0.04047300  | 2.10170100  | 2.91245600  |
| H | -0.11465100 | 2.06729600  | 3.99666600  |
| H | 0.58533400  | 1.18056300  | 2.67155300  |
| C | 0.85049300  | 3.33195500  | 2.49595400  |
| H | 0.86644900  | 3.40980800  | 1.40549700  |
| H | 0.35592800  | 4.23919800  | 2.86173100  |
| C | 2.30141400  | 3.31045200  | 3.02602500  |
| H | 2.31313000  | 3.13518200  | 4.10640800  |
| H | 2.77721700  | 4.27183400  | 2.81445500  |
| C | 3.12051200  | 2.22529100  | 2.34386200  |
| F | 3.08438600  | 0.14696100  | -0.29330200 |
| F | -3.08785300 | -0.15562500 | -0.27744200 |
